# Supplementary material for: Tetrakis(trifluoromethanesulfonyl)propane: highly effective Brønsted acid catalyst for vinylogous Mukaiyama–Michael reaction of α,β-enones with silyloxyfurans
Source: Royal Society of Chemistry journal article supplement (doi:10.1039/b800815a), 2008-01-01
Supplement: b800815a.pdf [file b800815a.pdf]

## Tetrakis(trifluoromethanesulfonyl)propane: Highly Effective Brønsted Acid Catalyst for Vinylogous Mukaiyama-Michael Reaction of $\alpha,\beta$ -Enones with Silyloxyfurans

Arata Takahashi, Hikaru Yanai and Takeo Taguchi\*

*School of Pharmacy, Tokyo University of Pharmacy and Life Sciences, 1423-1 Horinouchi, Hachioji, Tokyo 192-0392, Japan*

E-mail: taguchi@ps.toyaku.ac.jp

### Supporting Information

#### Table of contents

|                                                                                                                             |       |
|-----------------------------------------------------------------------------------------------------------------------------|-------|
| 1. General and materials                                                                                                    | p. 1  |
| 2. Preparation of 1,1,3,3-tetrakis(trifluoromethanesulfonyl)propane <b>1</b>                                                | p. 1  |
| 3. Preparation of $\alpha,\beta$ -unsaturated ketones <b>2</b>                                                              | p. 2  |
| 4. Preparation of 2-silyloxyfurans                                                                                          | p. 2  |
| 5. Vinylogous Mukaiyama-Michael reaction of $\alpha,\beta$ -enones <b>2</b><br>with silyloxyfurans catalyzed by carbon acid | p. 2  |
| 6. X-ray structure of 1,1,3,3-tetrakis(trifluoromethanesulfonyl)propane <b>1</b>                                            | p. 5  |
| 7. $^1\text{H}$ and $^{13}\text{C}$ NMR spectra of <b>1</b> and new compounds                                               | p. 6  |
| 8. References                                                                                                               | p. 34 |

#### 1. General and materials

All reactions were carried out under argon atmosphere.  $^1\text{H}$  and  $^{13}\text{C}$  NMR spectra were taken on Varian Mercury300 or Bruker DPX400 spectrometers, and chemical shifts were reported in parts per million (ppm) using  $\text{CHCl}_3$  (7.26 ppm) in  $\text{CDCl}_3$  for  $^1\text{H}$  NMR, and  $\text{CDCl}_3$  (77.01 ppm) for  $^{13}\text{C}$  NMR as an internal standard, respectively. Infrared (IR) spectra were recorded on JASCO FT/IR-620 or JASCO FT/IR-4100 infrared spectrophotometers. Mass spectra (MS) were obtained on a Micromass LCT (ESI-TOF) or a Micromass Auto Spec (EI). Medium pressure liquid chromatography (MPLC) was performed using prepacked column (KUSANO Prepacked column Si-10, 40 x 300 mm I. D., silica gel, 50  $\mu\text{m}$ ) with RI detector.

#### 2. Preparation of 1,1,3,3-tetrakis(trifluoromethanesulfonyl)propane (1)

This compound was prepared by the reported procedure.<sup>1</sup>  $^1\text{H}$  NMR (400 MHz,  $\text{CDCl}_3$ )  $\delta$  3.46 (2H, t,  $J = 7.0$  Hz), 5.83 (2H, t,  $J = 7.0$  Hz);  $^{13}\text{C}$  NMR (100.6 MHz,  $\text{CDCl}_3$ )  $\delta$  22.8, 72.5, 119.3 (q,  $J_{\text{C-F}} = 329.6$  Hz);  $^{19}\text{F}$  NMR (282 MHz,  $\text{CDCl}_3$ )  $\delta$  -9.5 (12F, s). Structure was confirmed by X-ray crystallographic analysis (CCDC 674990). Crystal data.  $\text{C}_7\text{H}_4\text{F}_{12}\text{O}_8\text{S}_4$ ,  $M = 572.34$ , monoclinic,  $a = 9.9367(9)$ ,  $b = 16.5820(15)$ ,  $c = 10.9892(10)$  Å,  $\text{Volume} = 1760.0(3)$ ,  $T = 100$  K, space group P 2<sub>1</sub>/c,  $Z = 4$ .

### **3. Preparation of $\alpha,\beta$ -unsaturated ketones (2)**

4-Methylpent-3-en-2-one **2a** and but-3-en-2-one **2c** are available commercially. 1-Cyclohexylideneacetone **2b**,<sup>2</sup> 1-phenylprop-2-en-1-one **2d**<sup>3</sup> and 1-(4-bromophenyl)prop-2-en-1-one **2e**<sup>4</sup> were prepared by the reported procedure.

### **4. Preparation of 2-silyloxyfurans**

*tert*-Butyl(2-furyloxy)dimethylsilane,<sup>5</sup> *tert*-butyl(dimethyl)[(3-methyl-2-furyl)oxy]silane,<sup>6</sup> and *tert*-butyl(dimethyl)[(4-methyl-2-furyl)oxy]silane<sup>6</sup> were prepared by the reported procedure.

***tert*-Butyl(dimethyl)[(5-methyl-2-furyl)oxy]silane.** To a solution of 5-methylfuran-2(3*H*)-one (0.9 mL, 10 mmol) in CH<sub>2</sub>Cl<sub>2</sub> (2 mL), *tert*-butyl(dimethyl)silyl trifluoromethanesulfonate (2.1 mL, 10 mmol) and Et<sub>3</sub>N (2.1 mL 15 mmol) were added at 0 °C. After being stirred at room temperature for 2 h, extractive work-up and purification by silica gel column chromatography (hexane) gave *tert*-butyl(dimethyl)[(5-methyl-2-furyl)oxy]silane (1.27 g, 6.0 mmol, 60% yield) as colorless oil. IR (neat) 1628, 1592 cm<sup>-1</sup>; <sup>1</sup>H NMR (400 MHz, CDCl<sub>3</sub>)  $\delta$  0.27 (6H, s), 1.01 (9H, s), 2.19 (3H, s), 4.99 (1H, d, *J* = 3.0 Hz), 5.75-5.80 (1H, m); <sup>13</sup>C NMR (100.6 MHz, CDCl<sub>3</sub>)  $\delta$  -4.9, 13.5, 18.1, 25.6, 83.7, 106.1, 141.3, 155.3; MS (EI) *m/z* 212 [M]<sup>+</sup>. Anal. Calcd for C<sub>11</sub>H<sub>20</sub>O<sub>2</sub>Si: C, 62.21; H, 9.49. Found: C, 61.97; H, 9.25.

### **5. Vinylogous Mukaiyama-Michael reaction of $\alpha,\beta$ -enones (2) with silyloxyfurans catalyzed by carbon acid**

**5-(1,1-Dimethyl-3-oxobutyl)furan-2(5*H*)-one (3a).** To a solution of **1** in CH<sub>2</sub>Cl<sub>2</sub> (0.25 mM solution, 1.0 mL, 0.25  $\mu$ mol), a solution of **2a** (49 mg, 0.50 mmol) and *tert*-butyl(2-furyloxy)dimethylsilane (109 mg, 0.55 mmol) in CH<sub>2</sub>Cl<sub>2</sub> (1 mL) were added at -78 °C over 10 min. After being stirred for 2 h at -24 °C, reaction mixture was quenched with saturated NaHCO<sub>3</sub> aqueous solution and extracted with EtOAc (20 mL x 3). The organic layer was dried over MgSO<sub>4</sub>, then it was concentrated under reduced pressure. The resulting residue was treated by 1 M HCl (10 mL) in THF (10 mL) for 30 min at room temperature. The reaction mixture was diluted with H<sub>2</sub>O (10 mL), extracted with EtOAc (20 mL x 3), dried over MgSO<sub>4</sub> and evaporated. Purification of the resulting residue by column chromatography on silica gel (hexane / EtOAc = 2 : 1) gave **3a** (80.1 mg, 0.44 mmol, 88% yield) as colorless oil. IR (neat) 1754, 1713 cm<sup>-1</sup>; <sup>1</sup>H NMR (400 MHz, CDCl<sub>3</sub>)  $\delta$  0.91 (3H, s), 1.17 (3H, s), 2.14 (3H, s), 2.40 (1H, d, *J* = 17.1 Hz), 2.69 (1H, d, *J* = 17.1 Hz), 5.26-5.28 (1H, m), 6.15 (1H, dd, *J* = 5.8, 2.1 Hz), 7.47 (1H, dd, *J* = 5.8, 1.5 Hz); <sup>13</sup>C NMR (100.6 MHz, CDCl<sub>3</sub>)  $\delta$  22.3, 22.9, 31.7, 36.7, 50.2, 88.1, 122.3, 154.3, 172.8, 207.3; MS (ESI-TOF) *m/z* ; 183 [M+H]<sup>+</sup>; HRMS calcd for C<sub>10</sub>H<sub>15</sub>O<sub>3</sub> [M+H]<sup>+</sup>, 183.1021; found, 183.1012. Anal. Calcd for C<sub>10</sub>H<sub>14</sub>O<sub>3</sub>: C, 65.91; H, 7.74. Found: C, 65.74; H, 7.70.

**5-[1-(2-Oxopropyl)cyclohexyl]furan-2(5*H*)-one (3b).** According to the synthesis of **3a**, **3b** was obtained in 90% yield (100.0 mg, 0.45 mmol) by the reaction of (*tert*-butyldimethylsilyloxy)furan (109 mg, 0.55 mmol) and **2b** (69 mg, 0.50 mmol) in the presence of **1a** (0.74 mg, 1.3  $\mu$ mol) at -24 °C for 3 h. Colorless oil. IR (neat) 1757, 1713 cm<sup>-1</sup>; <sup>1</sup>H NMR (400MHz, CDCl<sub>3</sub>)  $\delta$  1.10-1.45 (5H, m), 1.45-1.63 (4H, m), 1.74-1.82 (1H, m), 2.12 (3H, s), 2.54

(1H, d,  $J = 17.4$  Hz), 2.67 (1H, d,  $J = 17.4$  Hz), 5.34-5.37 (1H, m), 6.07 (1H, dd,  $J = 5.8, 2.1$  Hz), 7.51 (1H, dd,  $J = 5.8, 1.4$  Hz);  $^{13}\text{C}$  NMR (100.6 MHz,  $\text{CDCl}_3$ )  $\delta$  21.0, 21.1, 25.6, 30.5, 30.6, 32.1, 40.3, 43.6, 87.7, 121.9, 154.7, 172.9, 208.2; MS (ESI-TOF)  $m/z$  223  $[\text{M}+\text{H}]^+$ ; HRMS calcd for  $\text{C}_{13}\text{H}_{19}\text{O}_3$   $[\text{M}+\text{H}]^+$ , 223.1334; found, 223.1320. Anal. Calcd for  $\text{C}_{13}\text{H}_{18}\text{O}_3$ : C, 70.24; H, 8.16. Found: C, 70.45; H, 8.12.

**5-(3-Oxobutyl)furan-2(5H)-one (3c).** According to the synthesis of **3a**, the reaction of **2c** (35 mg, 0.50 mmol) and *tert*-butyl(2-furyloxy)dimethylsilane (109 mg, 0.55 mmol) in the presence of **1** (0.14 mg 0.25  $\mu\text{mol}$ ) for 2 h at  $-78$  °C give 1,4-adduct **3c** (63.1 mg, 0.41 mmol, 82% yield). The structure was confirmed by comparison of spectrum data with those reported in the literature.<sup>7</sup>

**5-(3-Oxo-3-phenylpropyl)furan-2(5H)-one (3d).** To a solution of *tert*-butyl(2-furyloxy)dimethylsilane (109 mg, 0.55 mmol) in  $\text{CH}_2\text{Cl}_2$  (1 mL), a solution of **1** (1.5 mM in  $\text{CH}_2\text{Cl}_2$ , 2.0 mL, 0.50  $\mu\text{mol}$ ) and **2d** (66 mg, 0.50 mmol) in  $\text{CH}_2\text{Cl}_2$  (0.8 mL) were added at  $-78$  °C over 10 min. After being stirred for 1 h at  $-78$  °C, reaction mixture was quenched with saturated  $\text{NaHCO}_3$  aqueous solution and extracted with EtOAc (20 mL x 3). The organic layer was dried over  $\text{MgSO}_4$ , then it was concentrated under reduced pressure. The resulting residue was treated by TfOH (150 mg, 1.0 mmol) in  $\text{CH}_2\text{Cl}_2$  (100 mL) for 1h at  $-78$  °C. The reaction mixture was diluted with  $\text{H}_2\text{O}$  (50 mL), extracted with  $\text{CH}_2\text{Cl}_2$  (40 mL), dried over  $\text{MgSO}_4$  and evaporated. Purification of the resulting residue by column chromatography on silica gel (hexane/EtOAc = 3 : 1) gave **3d** (96.2 mg, 0.45 mmol, 89% yield) as white solid. Mp. 91.1-91.5 °C. IR (KBr) 1769, 1682  $\text{cm}^{-1}$ ;  $^1\text{H}$  NMR (400MHz,  $\text{CDCl}_3$ )  $\delta$  1.97-2.03 (1H, m), 2.37-2.48 (1H, m), 3.08-3.28 (2H, m), 5.17-5.27 (1H, m), 6.11 (1H, dd,  $J = 5.7, 2.0$  Hz), 7.44-7.52 (3H, m), 7.55-7.61 (1H, m), 7.93-7.98 (2H, m);  $^{13}\text{C}$  NMR (100.6 MHz,  $\text{CDCl}_3$ )  $\delta$  27.1, 33.2, 82.3, 121.6, 127.9, 128.6, 133.3, 136.4, 156.2, 172.8, 198.5; MS (ESI-TOF)  $m/z$  239  $[\text{M}+\text{Na}]^+$ ; HRMS calcd for  $\text{C}_{13}\text{H}_{12}\text{NaO}_3$   $[\text{M}+\text{Na}]^+$ , 239.0684; found, 239.0671.

**5-[3-(4-Bromophenyl)-3-oxopropyl]furan-2(5H)-one (3e).** According to the synthesis of **3d**, **3e** was obtained in 88% yield (129.9 mg, 0.44 mmol) by the reaction of **2e** (106 mg, 0.50 mmol) and *tert*-butyl(2-furyloxy)dimethylsilane (109 mg, 0.55 mmol) in the presence of **1** (0.14 mg 0.25  $\mu\text{mol}$ ) for 1 h at  $-78$  °C. White solid. Mp. 84.3-84.9 °C. IR (KBr) 1746, 1687  $\text{cm}^{-1}$ ;  $^1\text{H}$  NMR (400MHz,  $\text{CDCl}_3$ )  $\delta$  1.88-1.99 (1H, m), 2.40 (1H, dtd,  $J = 14.5, 7.3, 3.8$  Hz), 3.03-3.23 (2H, m), 5.16-5.22 (1H, m), 6.12 (1H, dd,  $J = 5.7, 2.0$  Hz), 7.49 (1H, dd,  $J = 5.7, 1.5$  Hz), 7.58-7.63 (2H, m), 7.78-7.83 (2H, m);  $^{13}\text{C}$  NMR (100.6 MHz,  $\text{CDCl}_3$ )  $\delta$  27.1, 33.3, 82.1, 121.8, 128.7, 129.5, 132.0, 135.2, 156.0, 172.7, 197.5; MS (ESI-TOF)  $m/z$  295  $[\text{M}+\text{H}]^+$ ; HRMS calcd for  $\text{C}_{13}\text{H}_{12}\text{BrO}_3$   $[\text{M}+\text{H}]^+$ , 294.9970; found, 294.9966. Anal. Calcd for  $\text{C}_{13}\text{H}_{11}\text{BrO}_3$ : C, 52.91; H, 3.76. Found: C, 52.61; H, 4.00.

**5-(1,1-Dimethyl-3-oxobutyl)-3-methylfuran-2(5H)-one (3f) and**

**5-(1-{{*tert*-butyl(dimethyl)silyl}oxy}-1,3-dimethylbut-2-enyl)-3-methylfuran-2(5H)-one (4f).** According to the synthesis of **3a**, the reaction of **2a** (49 mg, 0.50 mmol) and *tert*-butyl(dimethyl) [(3-methyl-2-furyl)oxy]silane (117 mg, 0.55 mmol) in the presence of **1** (0.71 mg 1.3  $\mu\text{mol}$ ) for 2 h at  $-78$  °C give 1,4-adduct **3f** (82.3 mg, 0.42 mmol, 84% yield) and two diastereomers of 1,2-adduct **4f** (major isomer, 2.1 mg, 0.007 mmol 1.3% yield; minor isomer, 2.0

mg 0.006 mmol, 1.3% yield).

**3f** Colorless oil. IR (neat) 1756, 1713  $\text{cm}^{-1}$ ;  $^1\text{H}$  NMR (400 MHz,  $\text{CDCl}_3$ )  $\delta$  0.89 (3H, s), 1.14 (3H, s), 1.92-1.94 (3H, m), 2.14 (3H, s), 2.38 (1H, d,  $J = 16.9$  Hz), 2.65 (1H, d,  $J = 16.9$  Hz), 5.03-5.08 (1H, m), 7.04 (1H, t,  $J = 1.5$  Hz);  $^{13}\text{C}$  NMR (100.6 MHz,  $\text{CDCl}_3$ )  $\delta$  10.8, 22.4, 23.3, 32.0, 37.1, 50.5, 86.1, 131.2, 146.4, 174.2, 207.7; MS (ESI-TOF)  $m/z$  197  $[\text{M}+\text{H}]^+$ ; HRMS calcd for  $\text{C}_{11}\text{H}_{17}\text{O}_3$   $[\text{M}+\text{H}]^+$ , 197.1178; found, 197.1186. Anal. Calcd for  $\text{C}_{11}\text{H}_{16}\text{O}_3$ : C, 67.32; H, 8.22. Found: C, 67.30; H, 8.24.

**4f** For major isomer: colorless oil. IR (neat) 1767  $\text{cm}^{-1}$ ;  $^1\text{H}$  NMR (400 MHz,  $\text{C}_6\text{D}_6$ )  $\delta$  0.11 (6H, s), 0.96 (9H, s), 1.26 (3H, s), 1.52 (3H, d,  $J = 1.3$  Hz), 1.64 (3H, t,  $J = 1.8$  Hz), 1.69 (3H, d,  $J = 1.3$  Hz), 4.47-4.51 (1H, m), 4.92-4.96 (1H, m) 6.42-6.46 (1H, m);  $^{13}\text{C}$  NMR (100.6 MHz,  $\text{C}_6\text{D}_6$ )  $\delta$  -2.3, -1.9, 10.6, 18.5, 19.4, 26.1, 26.1, 27.6, 77.2, 86.8, 127.6, 131.4, 136.4, 145.6, 173.2; MS (ESI-TOF)  $m/z$  333  $[\text{M}+\text{Na}]^+$ ; HRMS calcd for  $\text{C}_{17}\text{H}_{30}\text{NaO}_3\text{Si}$   $[\text{M}+\text{Na}]^+$ , 333.1862; found, 333.1877. For minor isomer: colorless oil. IR (neat) 1767  $\text{cm}^{-1}$ ;  $^1\text{H}$  NMR (400 MHz,  $\text{C}_6\text{D}_6$ )  $\delta$  0.06 (3H, s), 0.09 (3H, s), 0.91 (9H, s), 1.26 (3H, s), 1.55 (3H, d,  $J = 1.3$  Hz), 1.58 (3H, d,  $J = 1.3$  Hz), 1.69 (3H, t,  $J = 1.7$  Hz), 4.46-4.50 (1H, m), 5.09-5.14 (1H, m), 6.48-6.52 (1H, m);  $^{13}\text{C}$  NMR (100.6 MHz,  $\text{C}_6\text{D}_6$ )  $\delta$  -2.3, -1.9, 10.7, 18.4, 19.5, 25.5, 26.1, 27.5, 76.3, 85.9, 129.7, 131.5, 135.4, 145.8, 173.4; MS (ESI-TOF)  $m/z$  333  $[\text{M}+\text{Na}]^+$ ; HRMS calcd for  $\text{C}_{17}\text{H}_{30}\text{NaO}_3\text{Si}$   $[\text{M}+\text{Na}]^+$ , 333.1862; found, 333.1880.

#### **5-(1,1-Dimethyl-3-oxobutyl)-4-methylfuran-2(5H)-one (3g) and**

**5-(1-({*tert*-butyl(dimethyl)silyl]oxy}-1,3-dimethylbut-2-enyl)-4-methylfuran-2(5H)-one (4g).** According to the synthesis of **3a**, the reaction of **2a** (49 mg, 0.50 mmol) and *tert*-butyl [(1-ethoxyvinyl)oxy]dimethylsilane (159 mg, 0.75 mmol) in the presence of **1** (0.71 mg 1.3  $\mu\text{mol}$ ) for 2 h at  $-78$   $^\circ\text{C}$  give 1,4-adduct **3g** (72.0 mg, 0.39 mmol, 78% yield) and two diastereomers of 1,2-adduct **4g** (major isomer, 9.4 mg, 0.03 mmol 6.3% yield; minor isomer, 2.6 mg 0.009 mmol, 1.8% yield).

**3g** colorless oil. IR (neat) 1763, 1713  $\text{cm}^{-1}$ ;  $^1\text{H}$  NMR (400 MHz,  $\text{CDCl}_3$ )  $\delta$  0.83 (3H, s), 1.18 (3H, s), 2.09 (3H, s), 2.13-2.15 (3H, m), 2.64 (1H, d,  $J = 17.4$  Hz), 2.74 (1H, d,  $J = 17.4$  Hz), 5.15 (1H, brs), 5.78 (1H, quin,  $J = 1.5$  Hz);  $^{13}\text{C}$  NMR (100.6 MHz,  $\text{CDCl}_3$ )  $\delta$  16.5, 22.4, 23.6, 31.5, 36.9, 51.7, 88.8, 119.1, 167.6, 172.6, 207.5; MS (ESI-TOF)  $m/z$  219  $[\text{M}+\text{Na}]^+$ ; HRMS calcd for  $\text{C}_{11}\text{H}_{16}\text{NaO}_3$   $[\text{M}+\text{Na}]^+$ , 219.0997; found, 219.0977. Anal. Calcd for  $\text{C}_{11}\text{H}_{16}\text{O}_3$ : C, 67.32; H, 8.22. Found: C, 67.31; H, 8.21.

**4g** For major isomer: colorless oil. IR (neat) 1767  $\text{cm}^{-1}$ ;  $^1\text{H}$  NMR (400 MHz,  $\text{C}_6\text{D}_6$ )  $\delta$  0.03 (3H, s), 0.06 (3H, s), 0.89 (9H, s), 1.21 (3H, s), 1.52 (3H, s), 1.53 (3H, s), 1.67-1.70 (3H, m), 5.17 (1H, s), 5.28 (1H, s), 5.51 (1H, m);  $^{13}\text{C}$  NMR (100.6 MHz,  $\text{C}_6\text{D}_6$ )  $\delta$  -2.3, -1.8, 16.0, 18.4, 19.4, 24.9, 26.2, 27.4, 76.5, 88.4, 119.5, 131.1, 134.4, 166.5, 171.9; MS (ESI-TOF)  $m/z$  333  $[\text{M}+\text{Na}]^+$ ; HRMS calcd for  $\text{C}_{17}\text{H}_{30}\text{NaO}_3\text{Si}$   $[\text{M}+\text{Na}]^+$ , 333.1862; found, 333.1881. For minor isomer: colorless oil. IR (neat) 1769  $\text{cm}^{-1}$ ;  $^1\text{H}$  NMR (400 MHz,  $\text{C}_6\text{D}_6$ )  $\delta$  0.09 (3H, s), 0.11 (3H, s), 0.93 (9H, s), 1.40 (3H, s), 1.50 (3H, d,  $J = 1.4$ ), 1.52-1.56 (3H, m), 1.70 (3H, d,  $J = 1.4$  Hz), 4.31 (1H, brs), 4.88 (1H, brs), 5.43-5.46 (1H, m);  $^{13}\text{C}$  NMR (100.6 MHz,  $\text{C}_6\text{D}_6$ )  $\delta$  -2.1, -2.0, 16.1, 18.4, 19.2, 26.2, 26.7, 27.8, 77.9, 89.5, 119.3, 126.9, 136.7, 166.2, 171.5; MS (ESI-TOF)  $m/z$  333  $[\text{M}+\text{Na}]^+$ ; HRMS calcd for  $\text{C}_{17}\text{H}_{30}\text{NaO}_3\text{Si}$   $[\text{M}+\text{Na}]^+$ , 333.1862; found, 333.1854.

#### **5-(1,1-Dimethyl-3-oxobutyl)-5-methylfuran-2(5H)-one (3h) and**

**3-(1,1-dimethyl-3-oxobutyl)-5-methylfuran-2(3H)-one (5).** According to the synthesis of **3a**, the reaction of **2a** (49 mg, 0.50 mmol) and *tert*-butyl(dimethyl) [(5-methyl-2-furyl)oxy]silane (159 mg, 0.75 mmol) in the presence of **1** (0.71 mg 1.3  $\mu$ mol) for 2 h at  $-78$   $^{\circ}$ C, then 2h at  $-24$   $^{\circ}$ C gave **3h** (51.0 mg, 0.28 mmol, 55% yield) and **5** (27.0 mg, 0.15 mmol 29% yield).

**3h** white solid. Mp. 55.5  $^{\circ}$ C. IR (KBr) 1752, 1705  $\text{cm}^{-1}$ ;  $^1\text{H}$  NMR (400MHz,  $\text{CDCl}_3$ )  $\delta$  1.04 (3H, s), 1.13 (3H, s), 1.39 (3H, s), 2.09 (3H, s), 2.40 (1H, d,  $J = 15.5$  Hz), 2.46 (1H, d,  $J = 15.5$  Hz), 6.00 (1H, d,  $J = 5.8$  Hz), 7.46 (1H, d,  $J = 5.8$  Hz);  $^{13}\text{C}$  NMR (100.6 MHz,  $\text{CDCl}_3$ )  $\delta$  19.8, 22.0, 22.5, 32.7, 39.6, 48.5, 93.5, 121.0, 159.5, 172.5, 207.7; MS (ESI-TOF)  $m/z$  197  $[\text{M}+\text{H}]^+$ ; HRMS calcd for  $\text{C}_{11}\text{H}_{17}\text{O}_3$   $[\text{M}+\text{H}]^+$ , 197.1178; found, 197.1177. Anal. Calcd for  $\text{C}_{11}\text{H}_{16}\text{O}_3$ : C, 67.32; H, 8.22. Found: C, 67.33; H, 8.17.

**5** colorless oil. IR (neat) 1789, 1713  $\text{cm}^{-1}$ ;  $^1\text{H}$  NMR (400 MHz,  $\text{CDCl}_3$ )  $\delta$  0.96 (3H, s), 1.12 (3H, s), 1.97-2.02 (3H, m), 2.15 (3H, s), 2.44 (1H, d,  $J = 17.2$  Hz), 2.91 (1H, d,  $J = 17.2$  Hz), 3.68 (1H, quin,  $J = 2.4$  Hz), 5.08-5.12 (1H, m);  $^{13}\text{C}$  NMR (100.6 MHz,  $\text{CDCl}_3$ )  $\delta$  14.0, 24.5, 25.6, 31.8, 35.7, 50.9, 52.2, 101.6, 152.5, 177.8, 208.0; MS (ESI-TOF)  $m/z$  197  $[\text{M}+\text{H}]^+$ ; HRMS calcd for  $\text{C}_{11}\text{H}_{17}\text{O}_3$   $[\text{M}+\text{H}]^+$ , 197.1178; found, 197.1183. Anal. Calcd for  $\text{C}_{11}\text{H}_{16}\text{O}_3$ : C, 67.32; H, 8.22. Found: C, 67.52; H, 8.32.

### 5. X-ray structure of 1,1,3,3-tetrakis(trifluoromethanesulfonyl)propane (1)

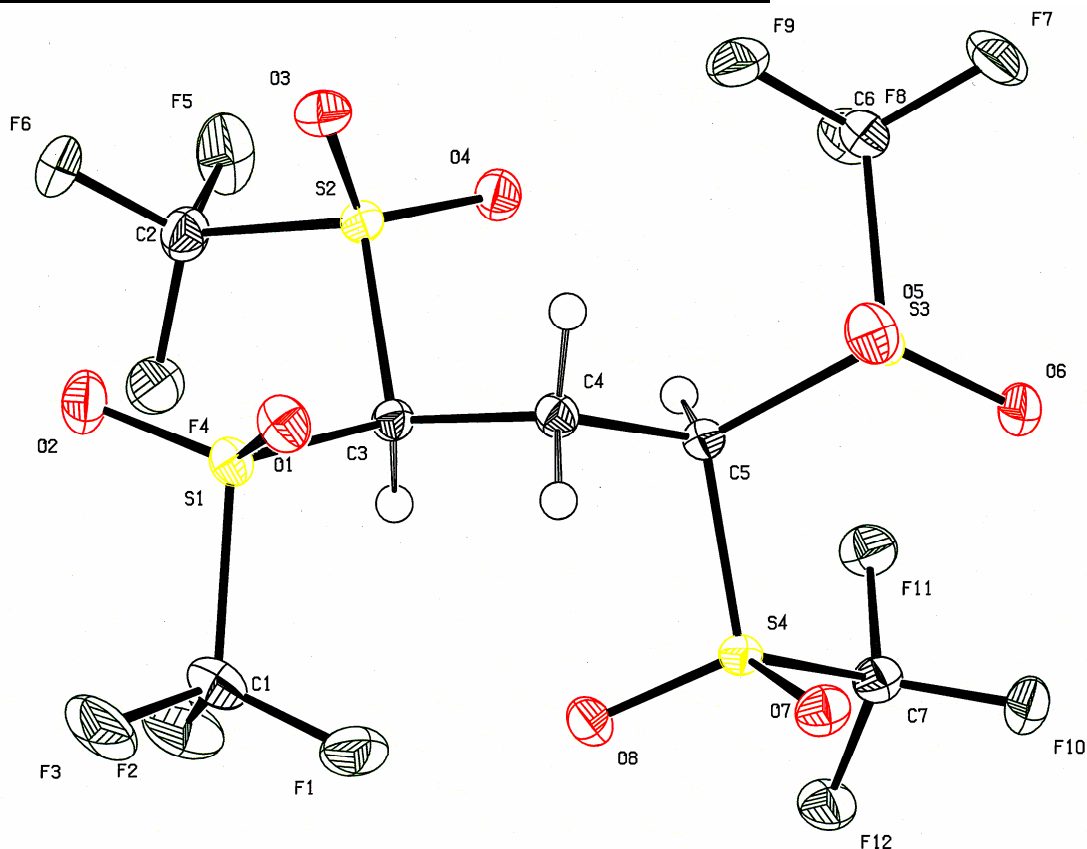

## 6. <sup>1</sup>H and <sup>13</sup>C NMR spectra of 1 and new compounds

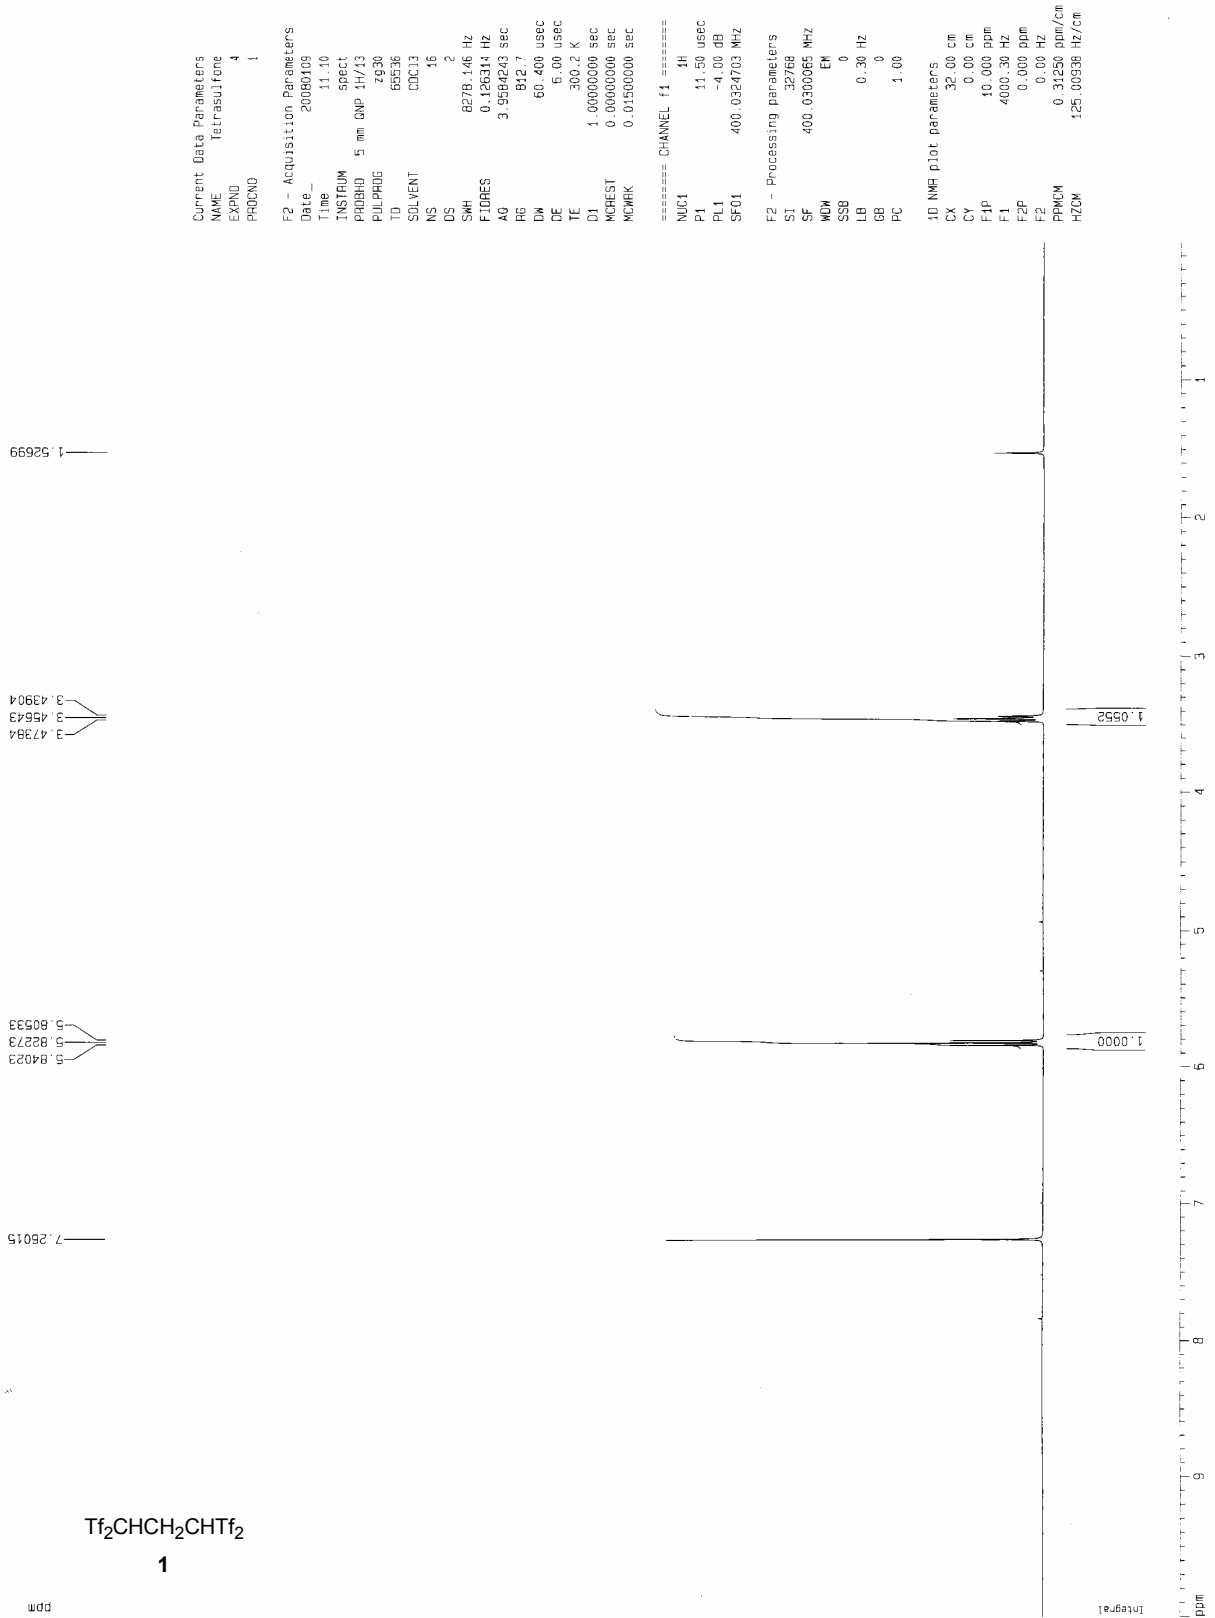

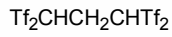

1

DPX400 carbon

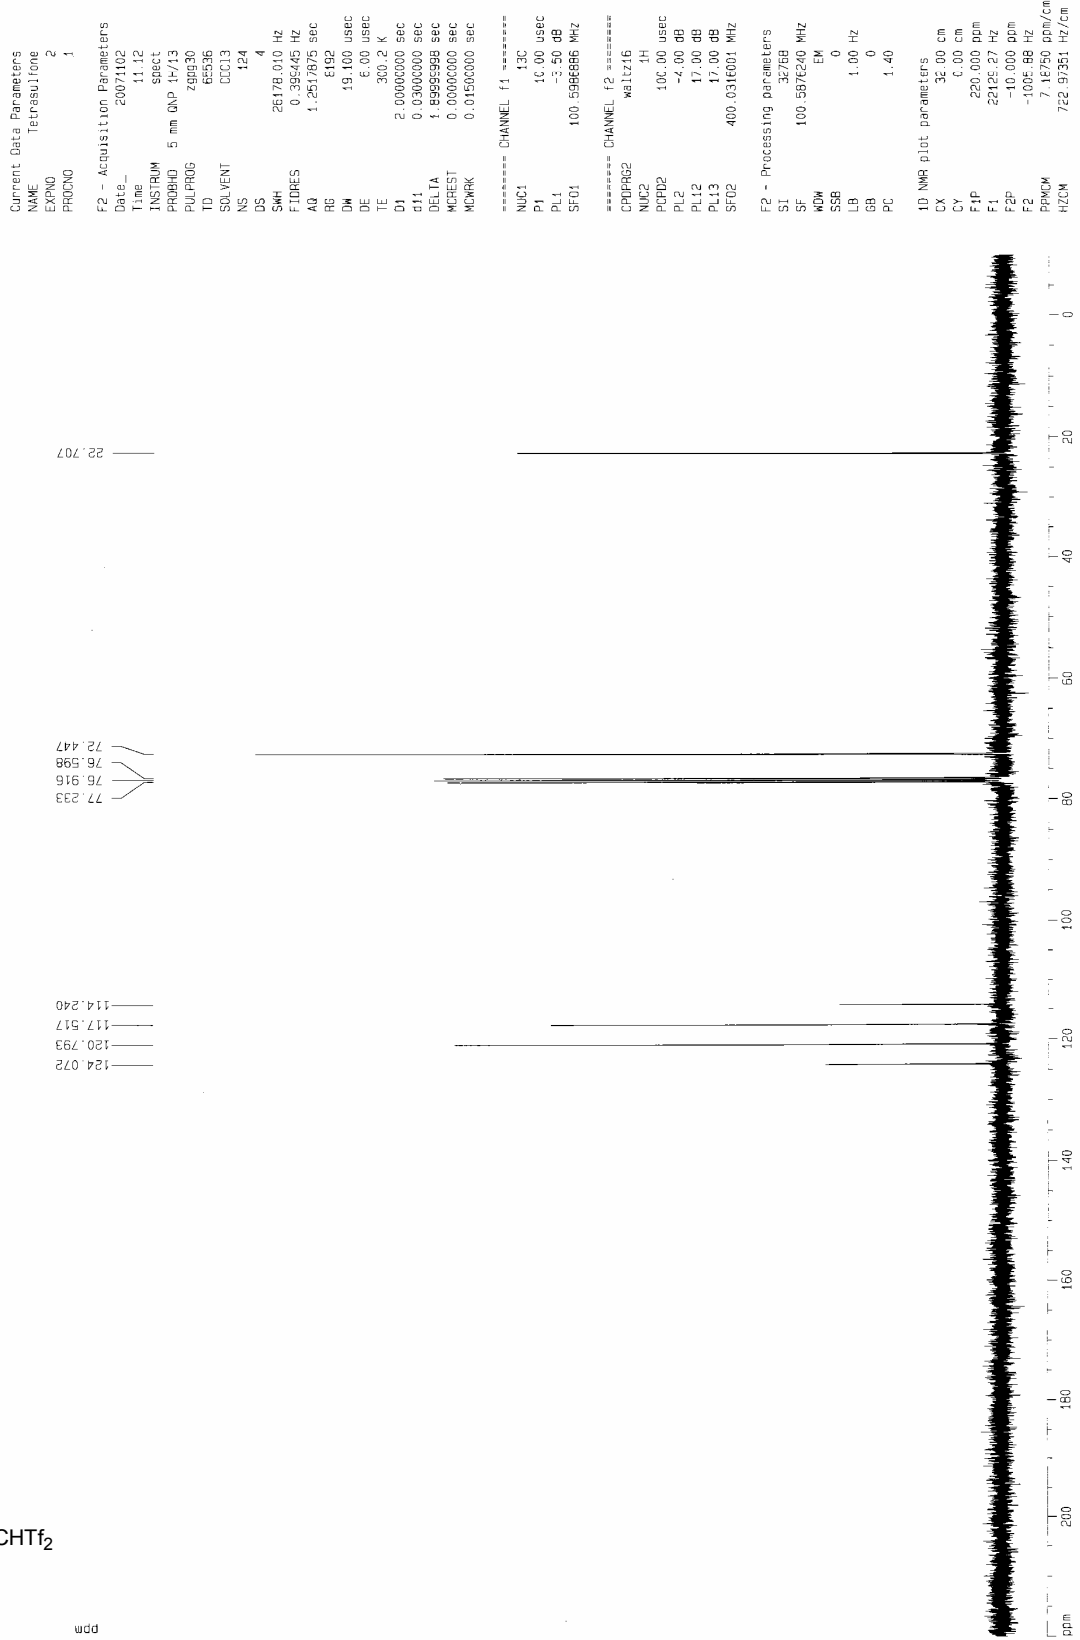

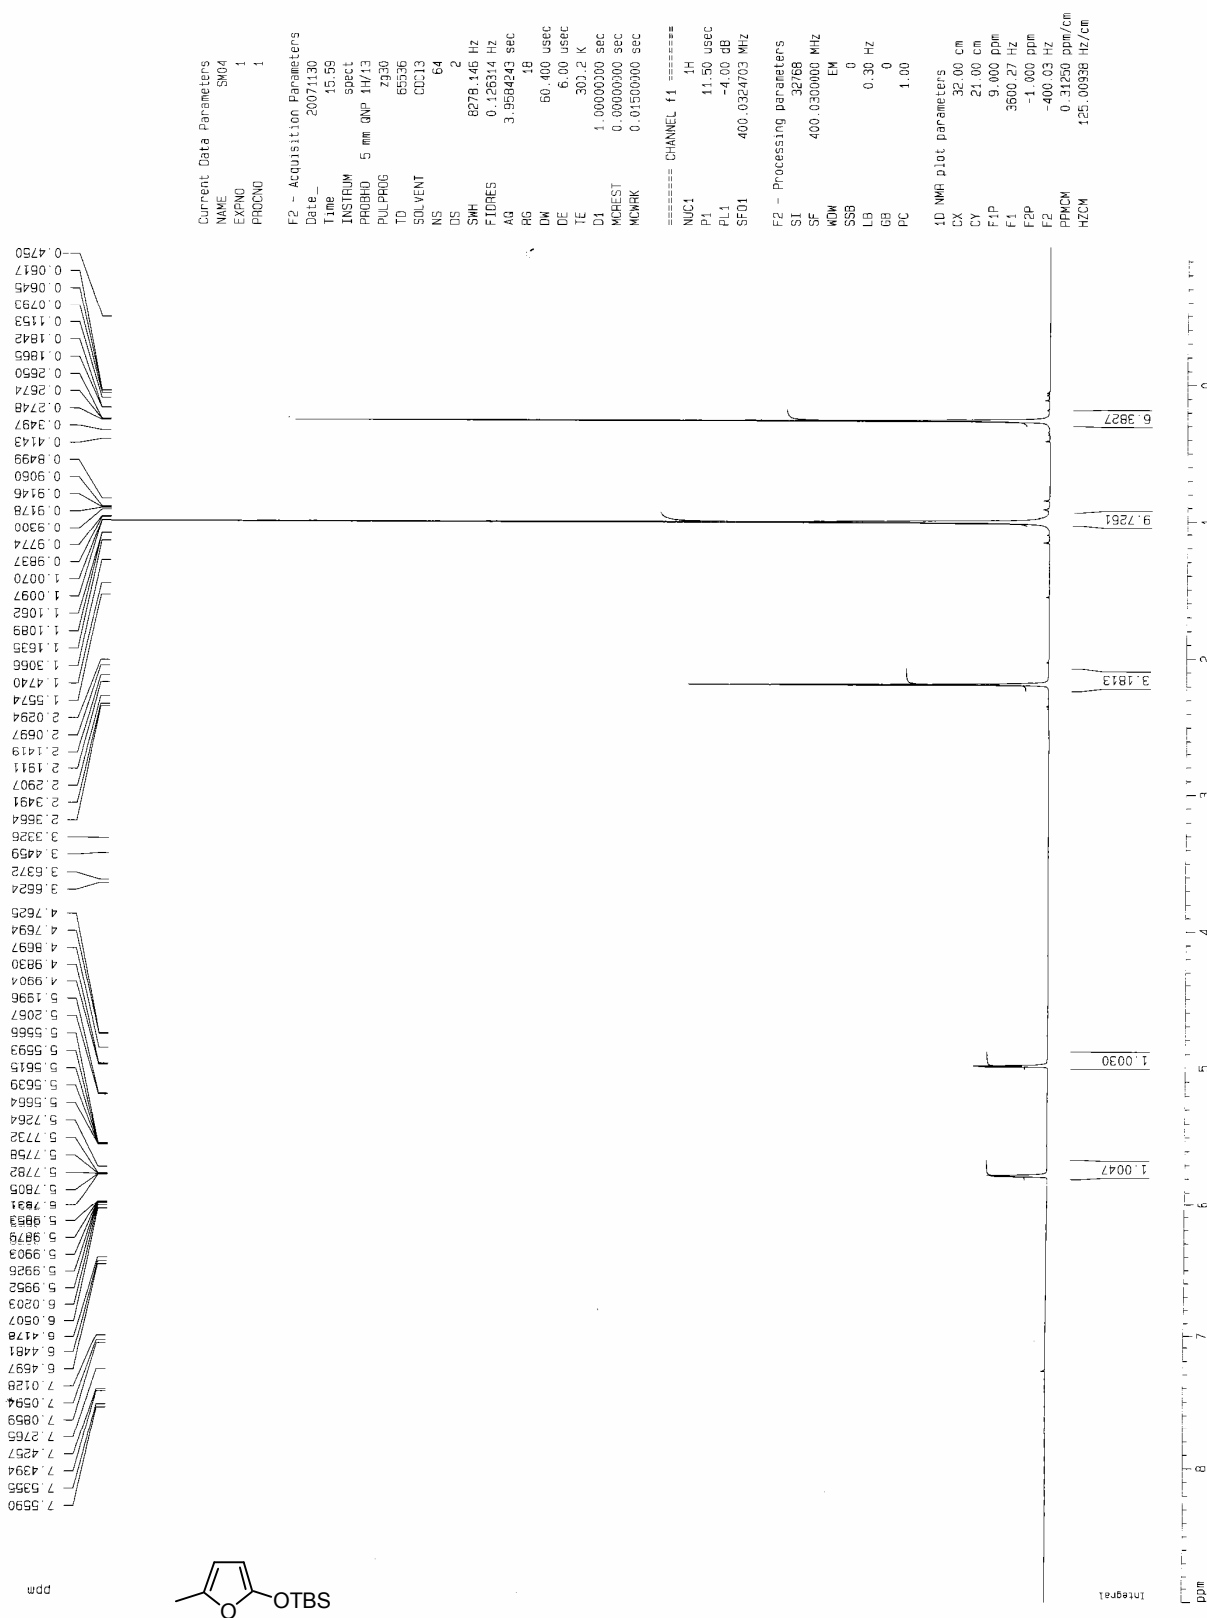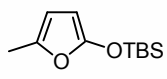



DPX400 Carbon

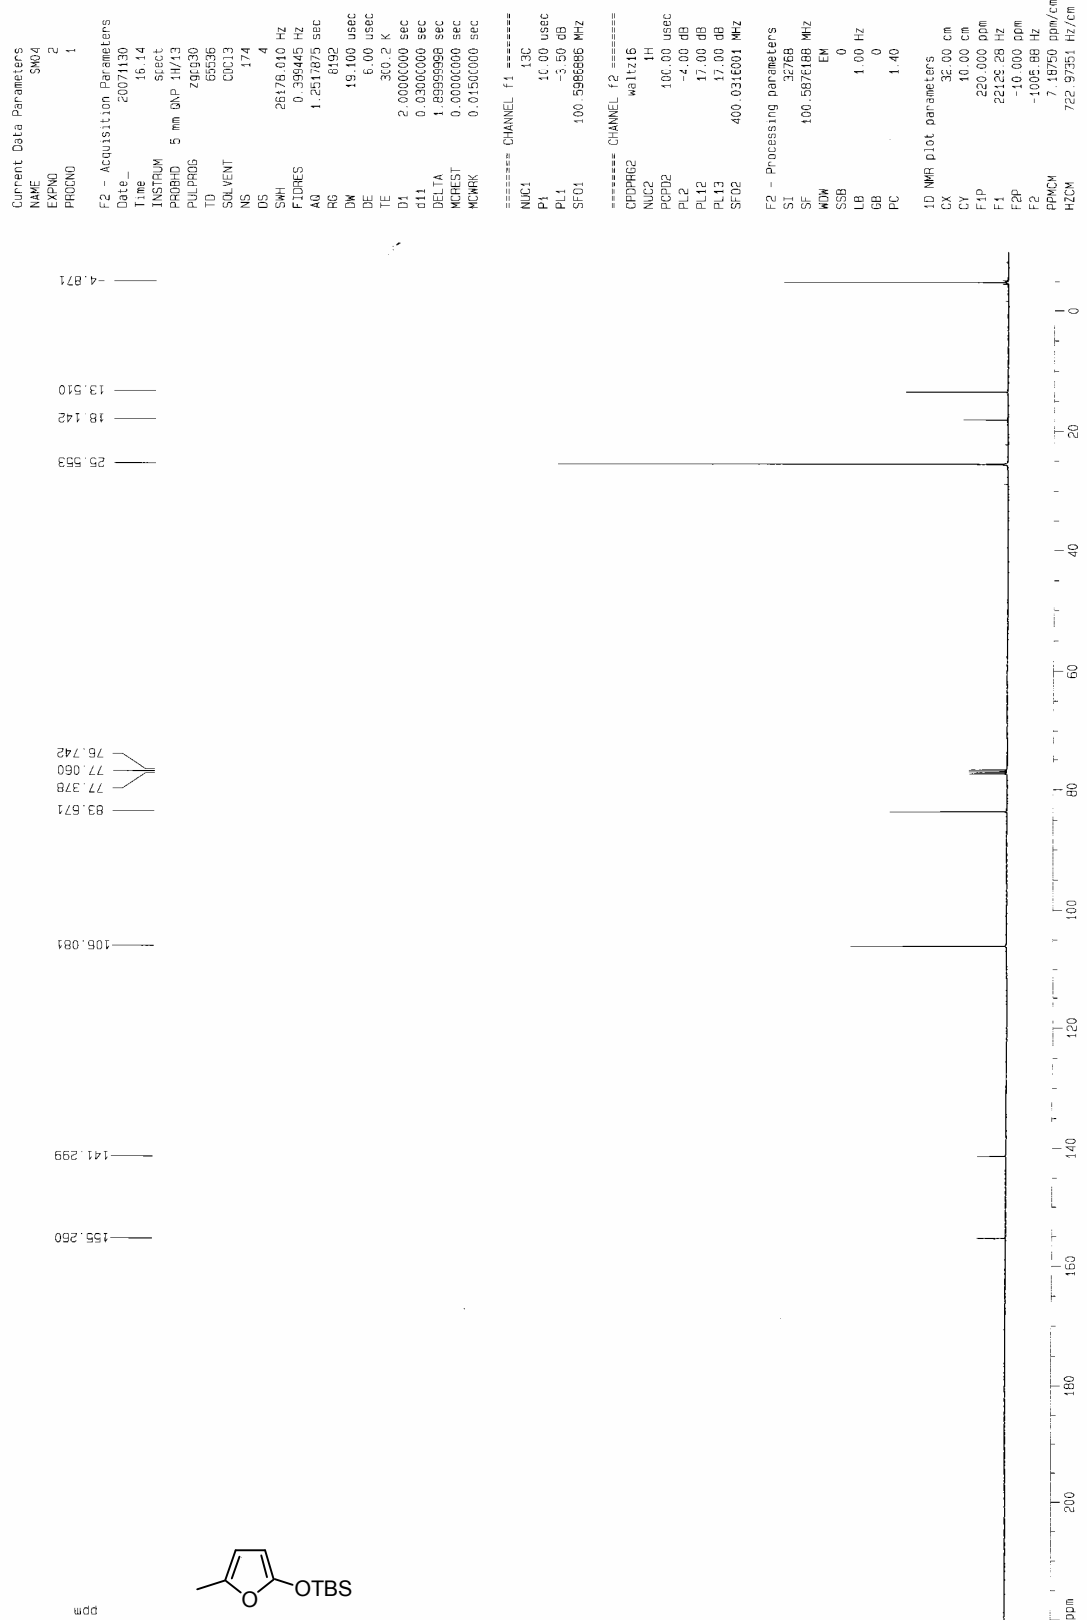

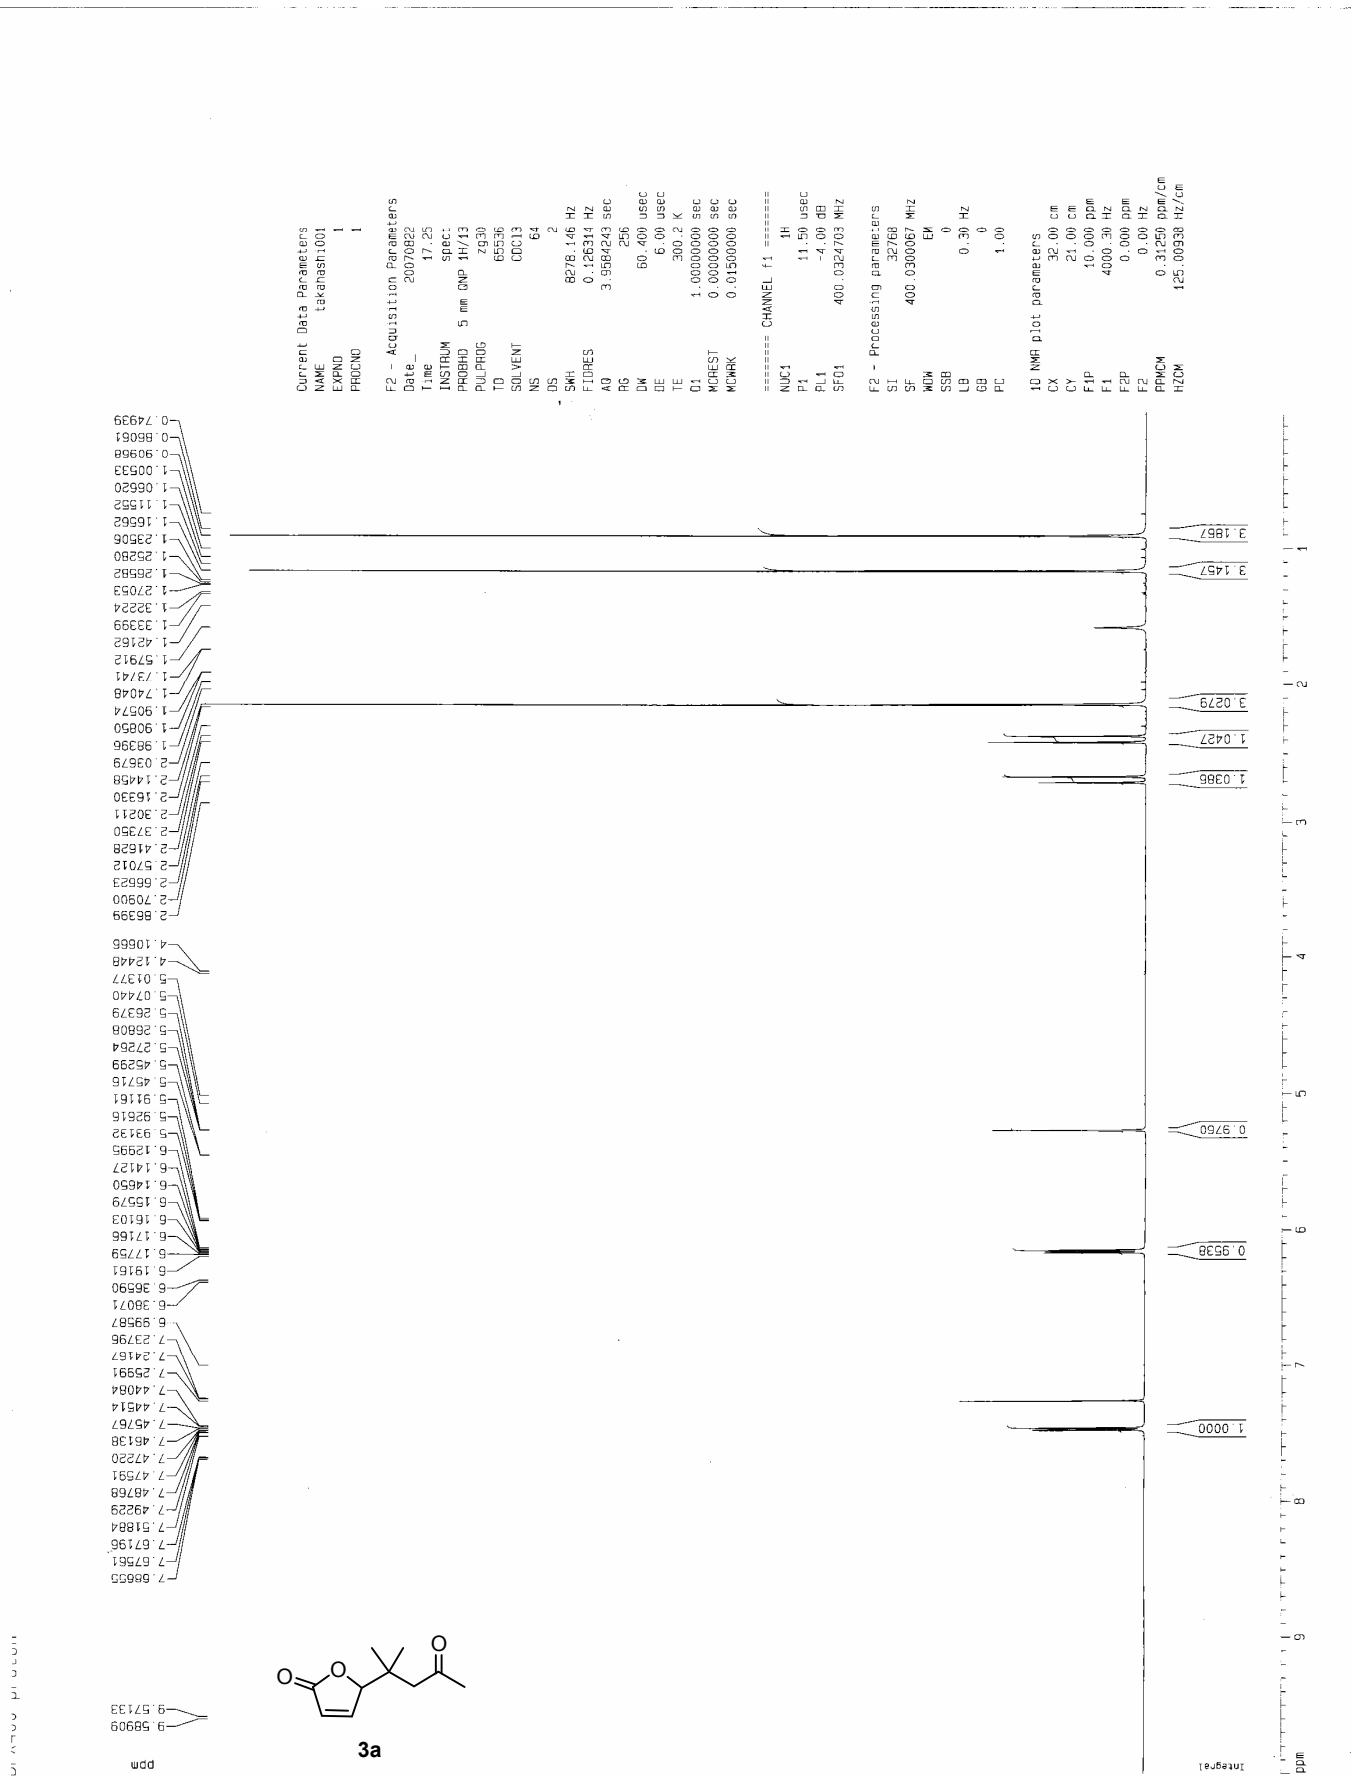

DPX400 carbon

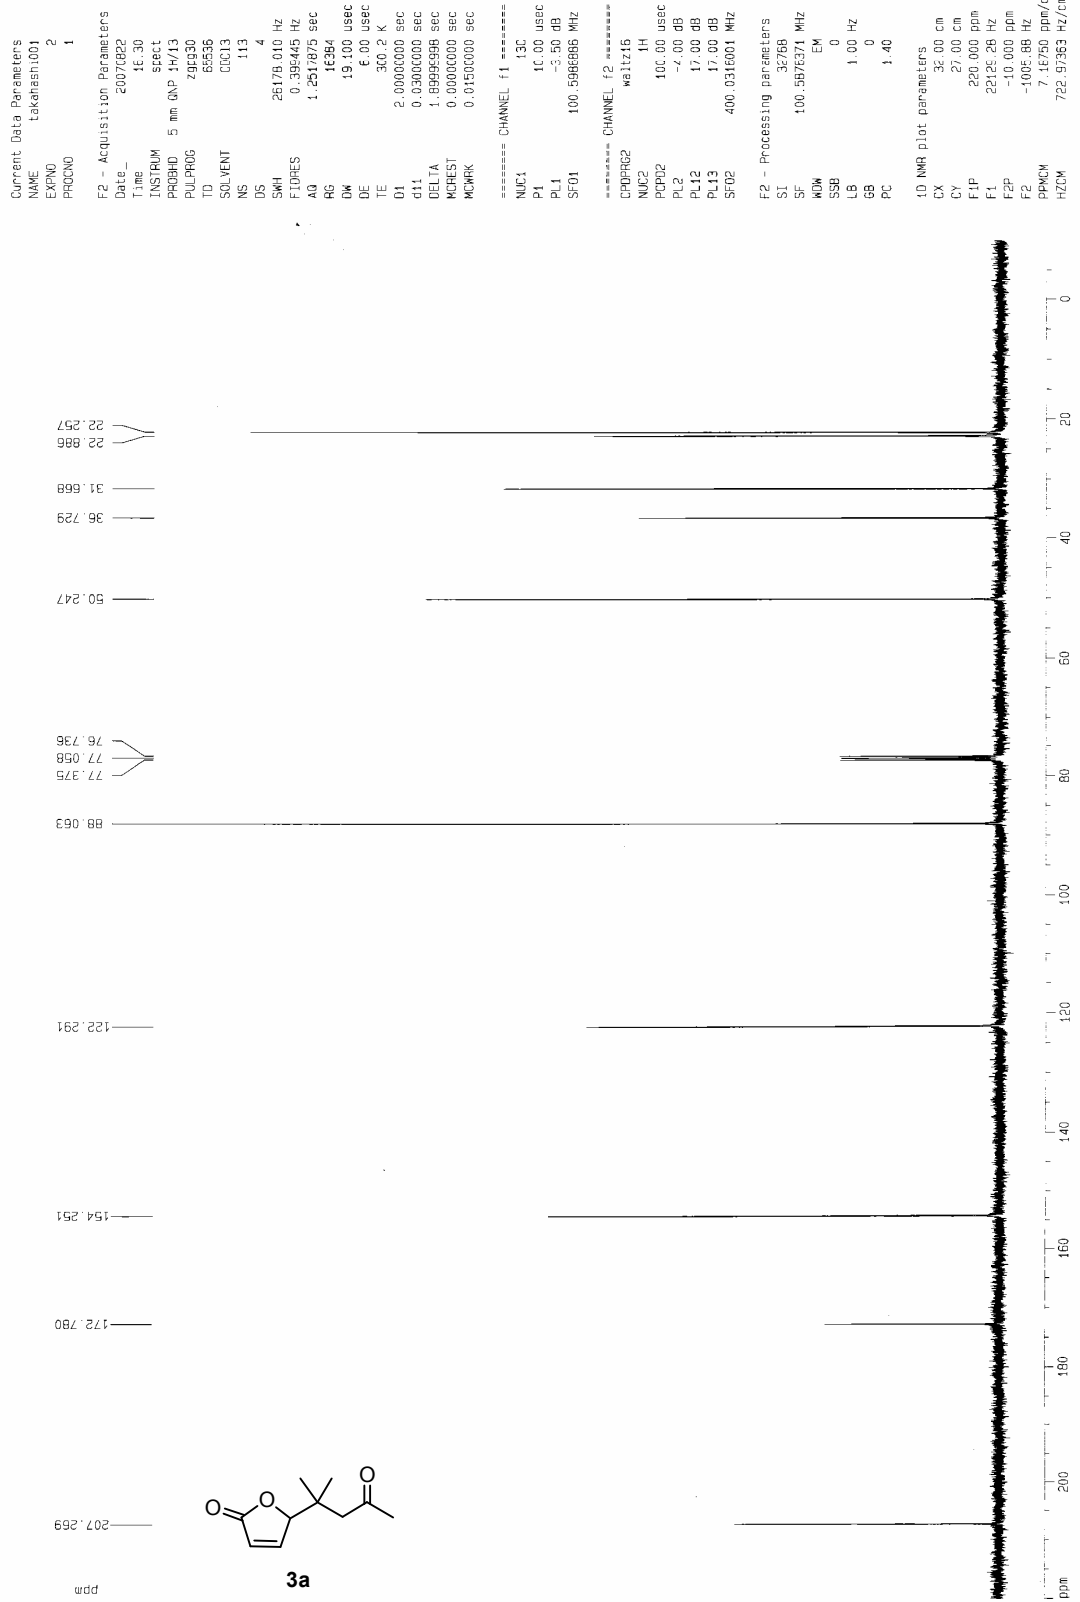

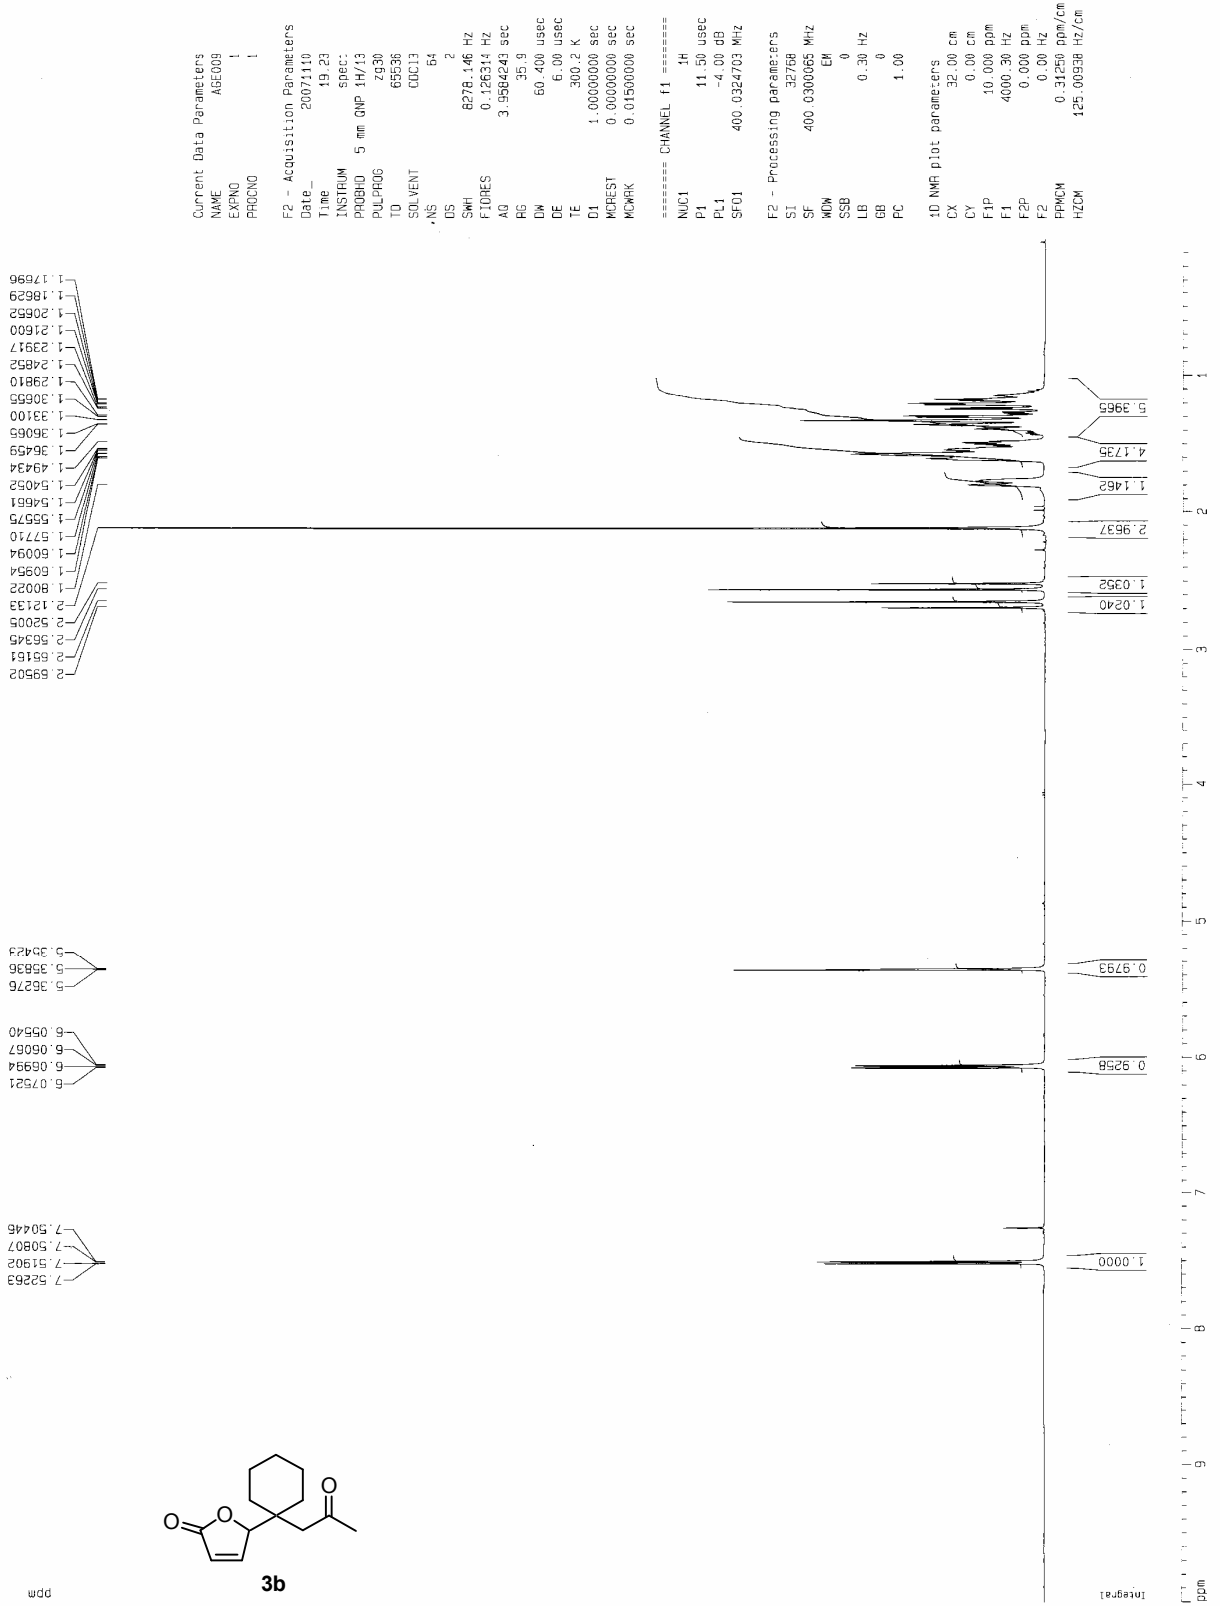

DPX400 carbon

```

Current Data Parameters
NAME          AGE009
EXPNO        2
PROCNO       1

F2 - Acquisition Parameters
Date_        20071110
Time         19.34
INSTRUM      spect
PROBHD       5 mm QNP 1H/13
PULPROG      zgpg30
TD           65536
SOLVENT      CDCl3
NS           164
DS           4
SWH          26178.010 Hz
FIDRES       0.398445 Hz
AQ           1.2517875 sec
RG           3849.1
DM           19.100 usec
DE           6.00 usec
TE           300.2 K
D1           2.00000000 sec
d11          0.03000000 sec
DELTA        1.89959988 sec
MCREST       0.00000000 sec
MCWPRK       0.01500000 sec

===== CHANNEL f1 =====
NUC1         13C
P1           10.00 usec
PL1          -3.50 dB
SFO1         100.5986666 MHz

===== CHANNEL f2 =====
CPDPRG2      waltz16
NUC2         1H
PCPD2        100.00 usec
PL2          -4.00 dB
PL12         17.00 dB
PL13         17.00 dB
SFO2         400.0315001 MHz

F2 - Processing parameters
SI           32768
SF           100.5876310 MHz
WDW          EM
SSB          0
LB           1.00 Hz
GB           0
PC           1.40

1D NMR plot Parameters
CX           32.00 cm
CY           17.00 cm
F1P          220.000 ppm
F1           22125.28 Hz
F2P          -10.000 ppm
F2           -1100E 88 Hz
PPMCK       7.1E750 ppm/cm
HZCM        722.97363 Hz/cm
    
```

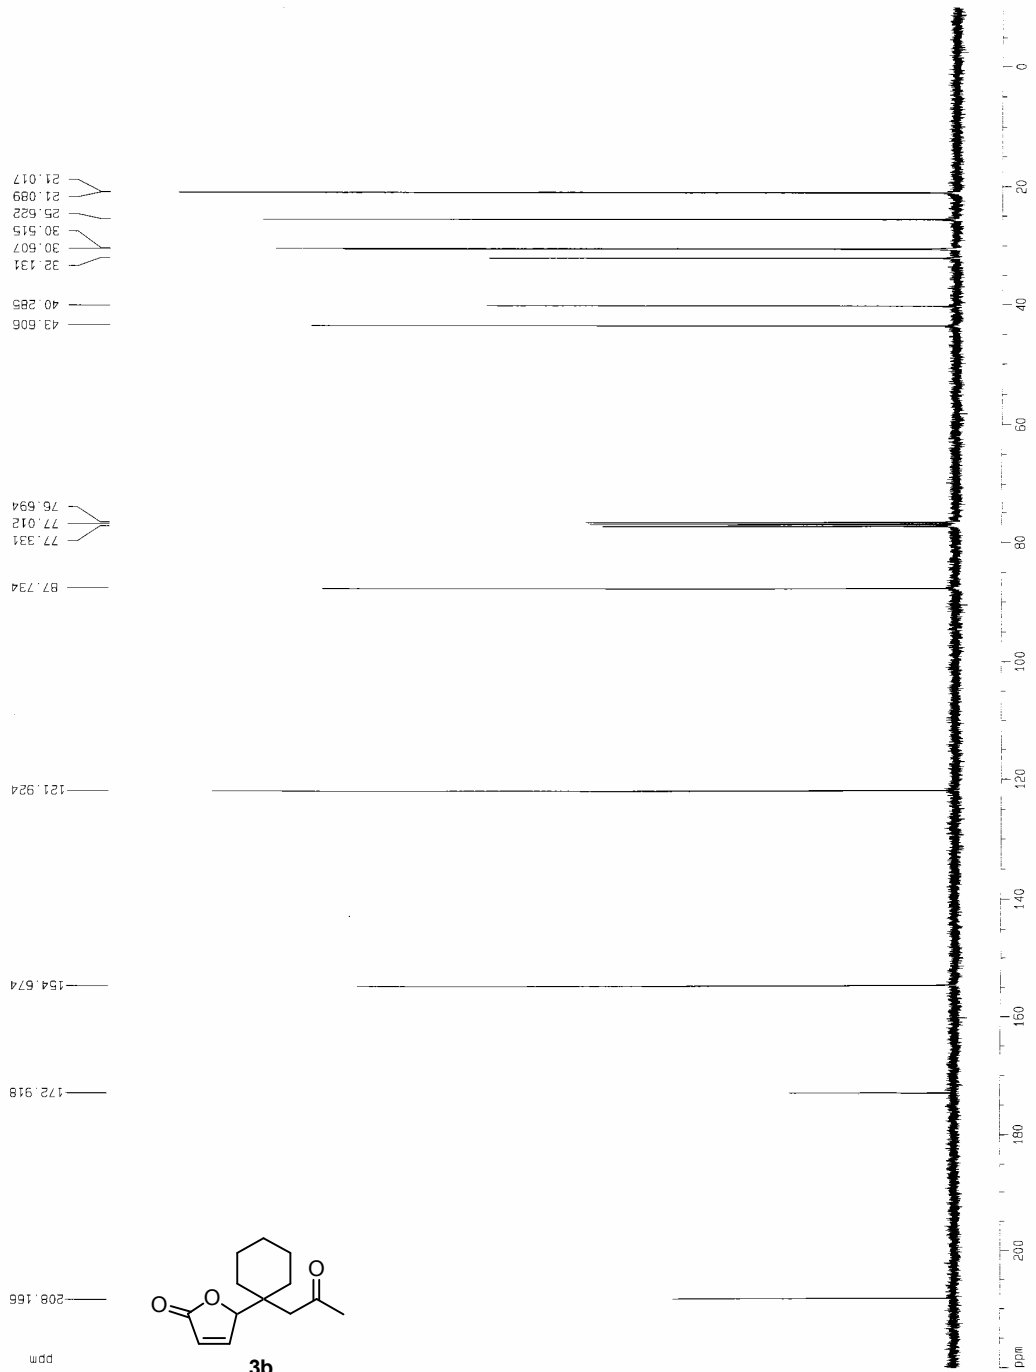

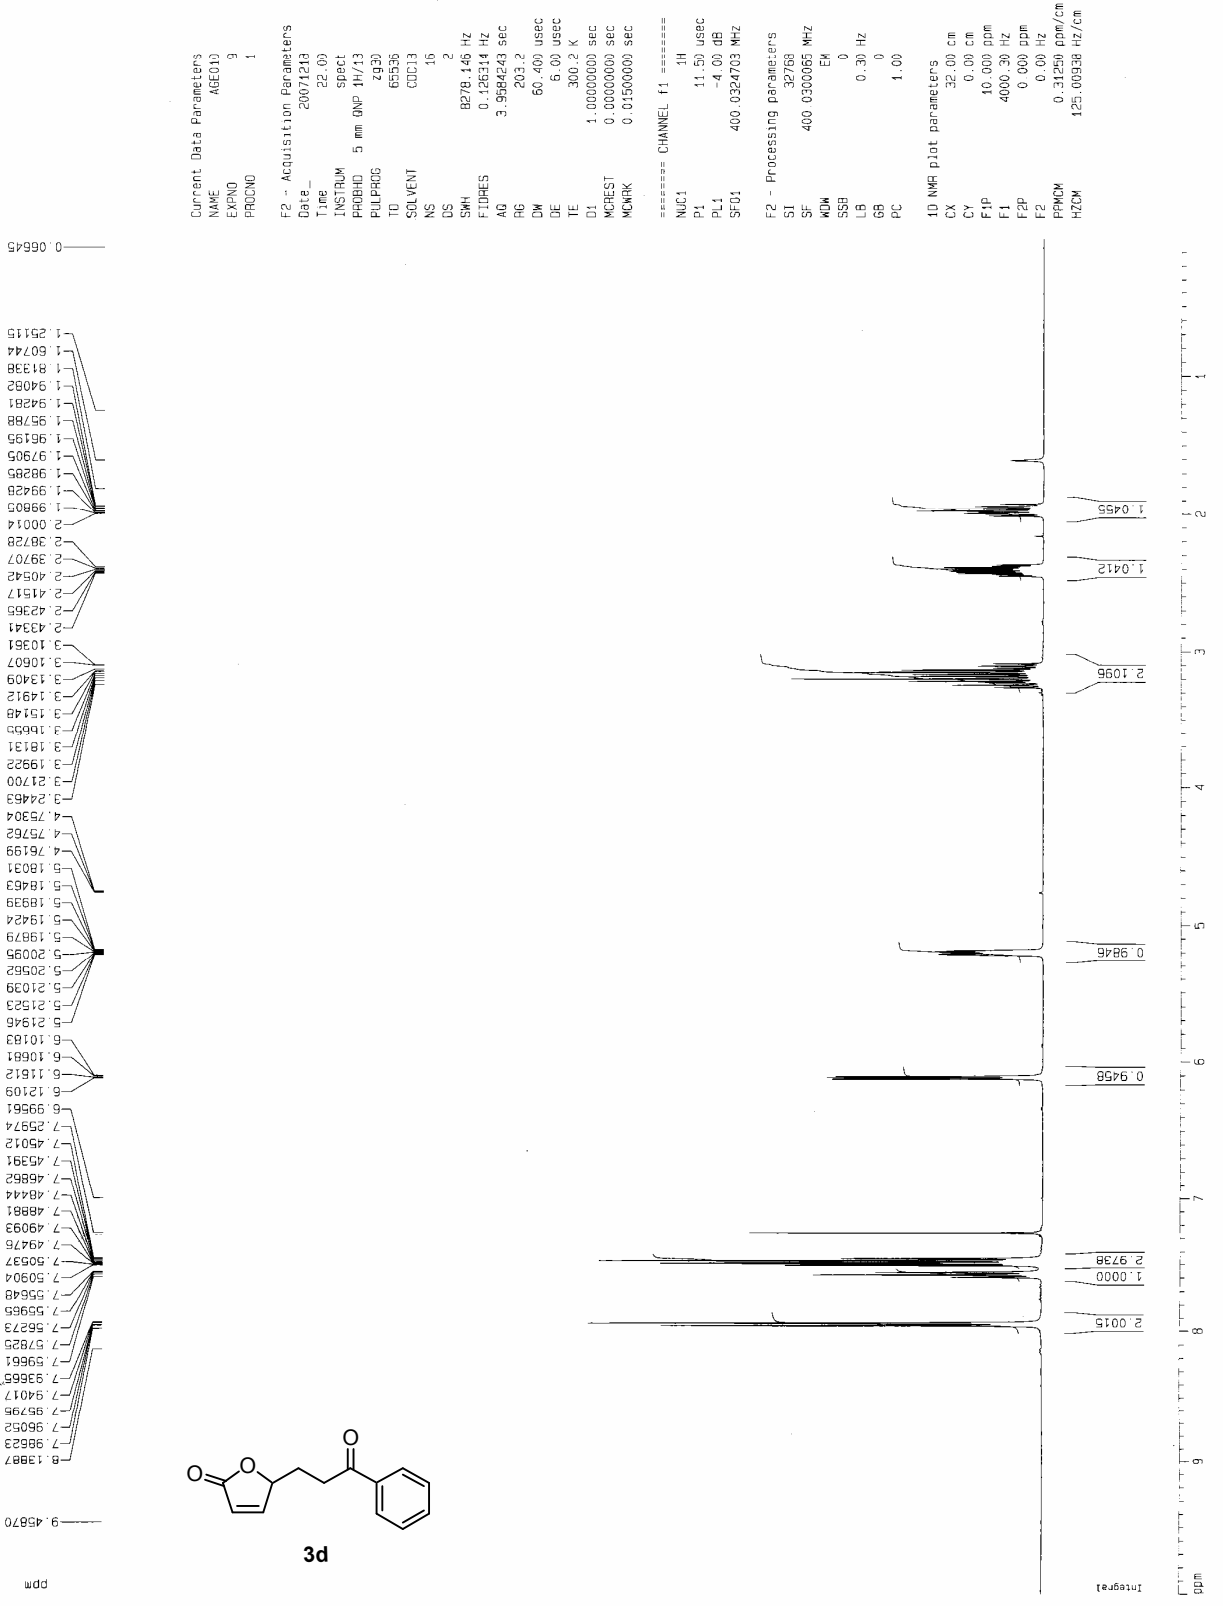

DPX400 carbon

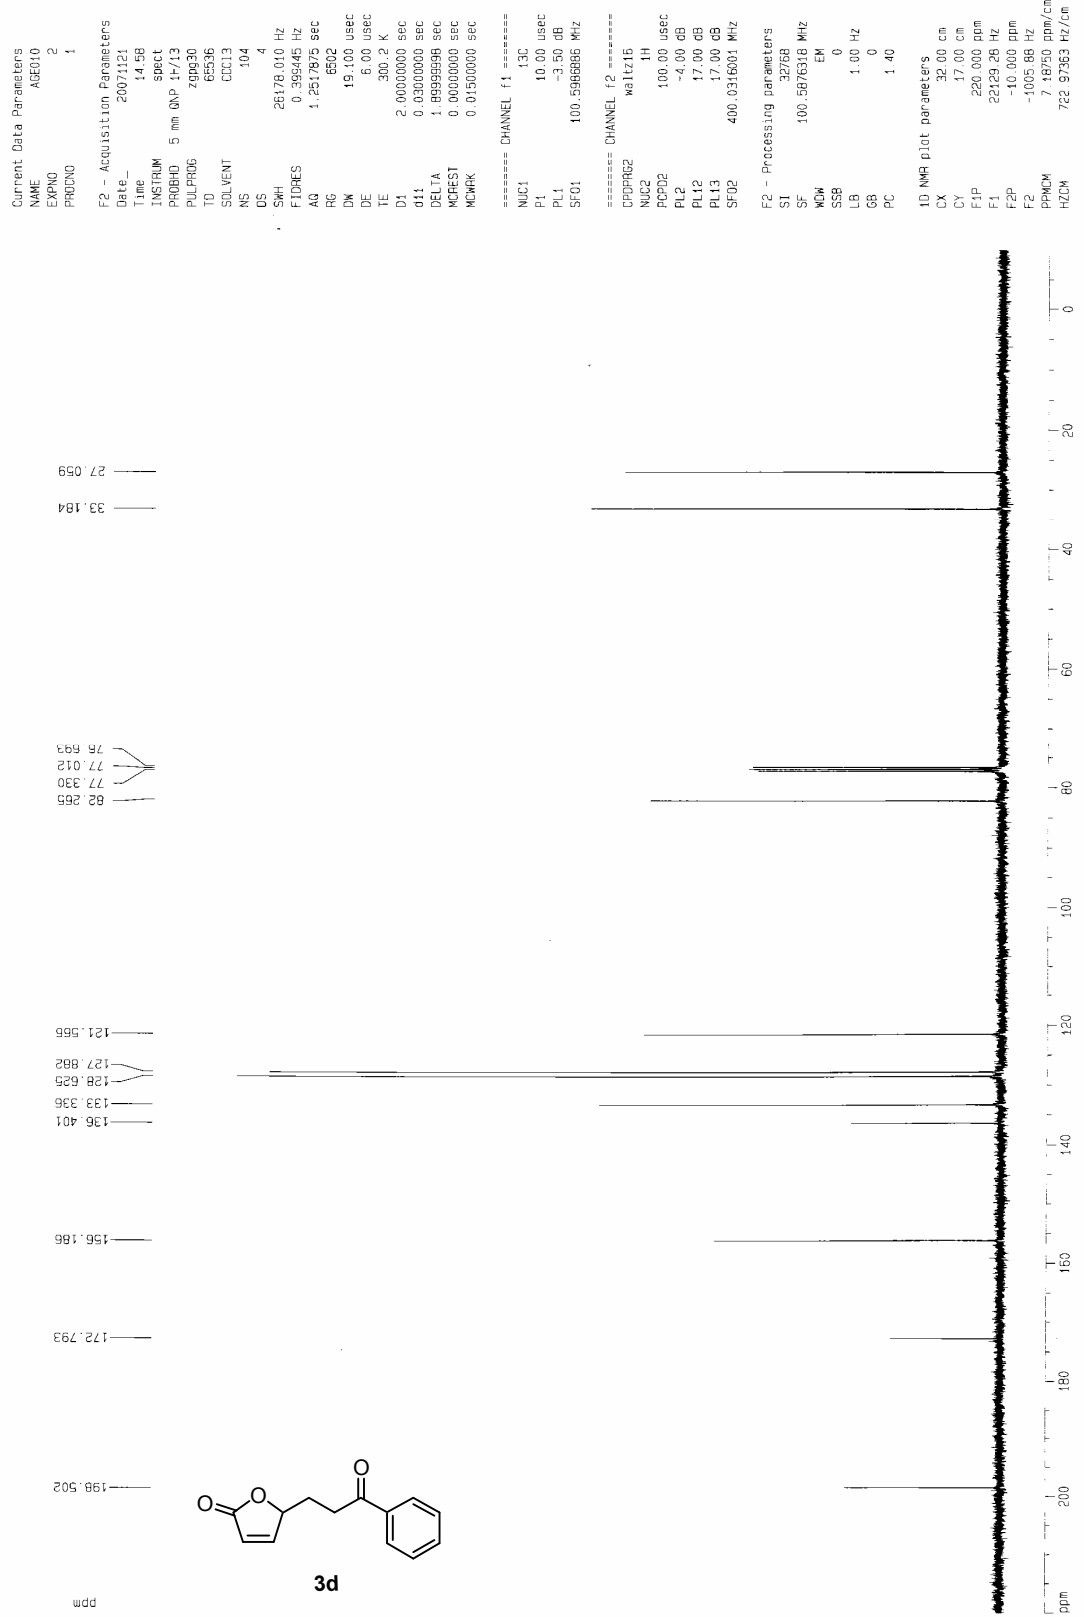

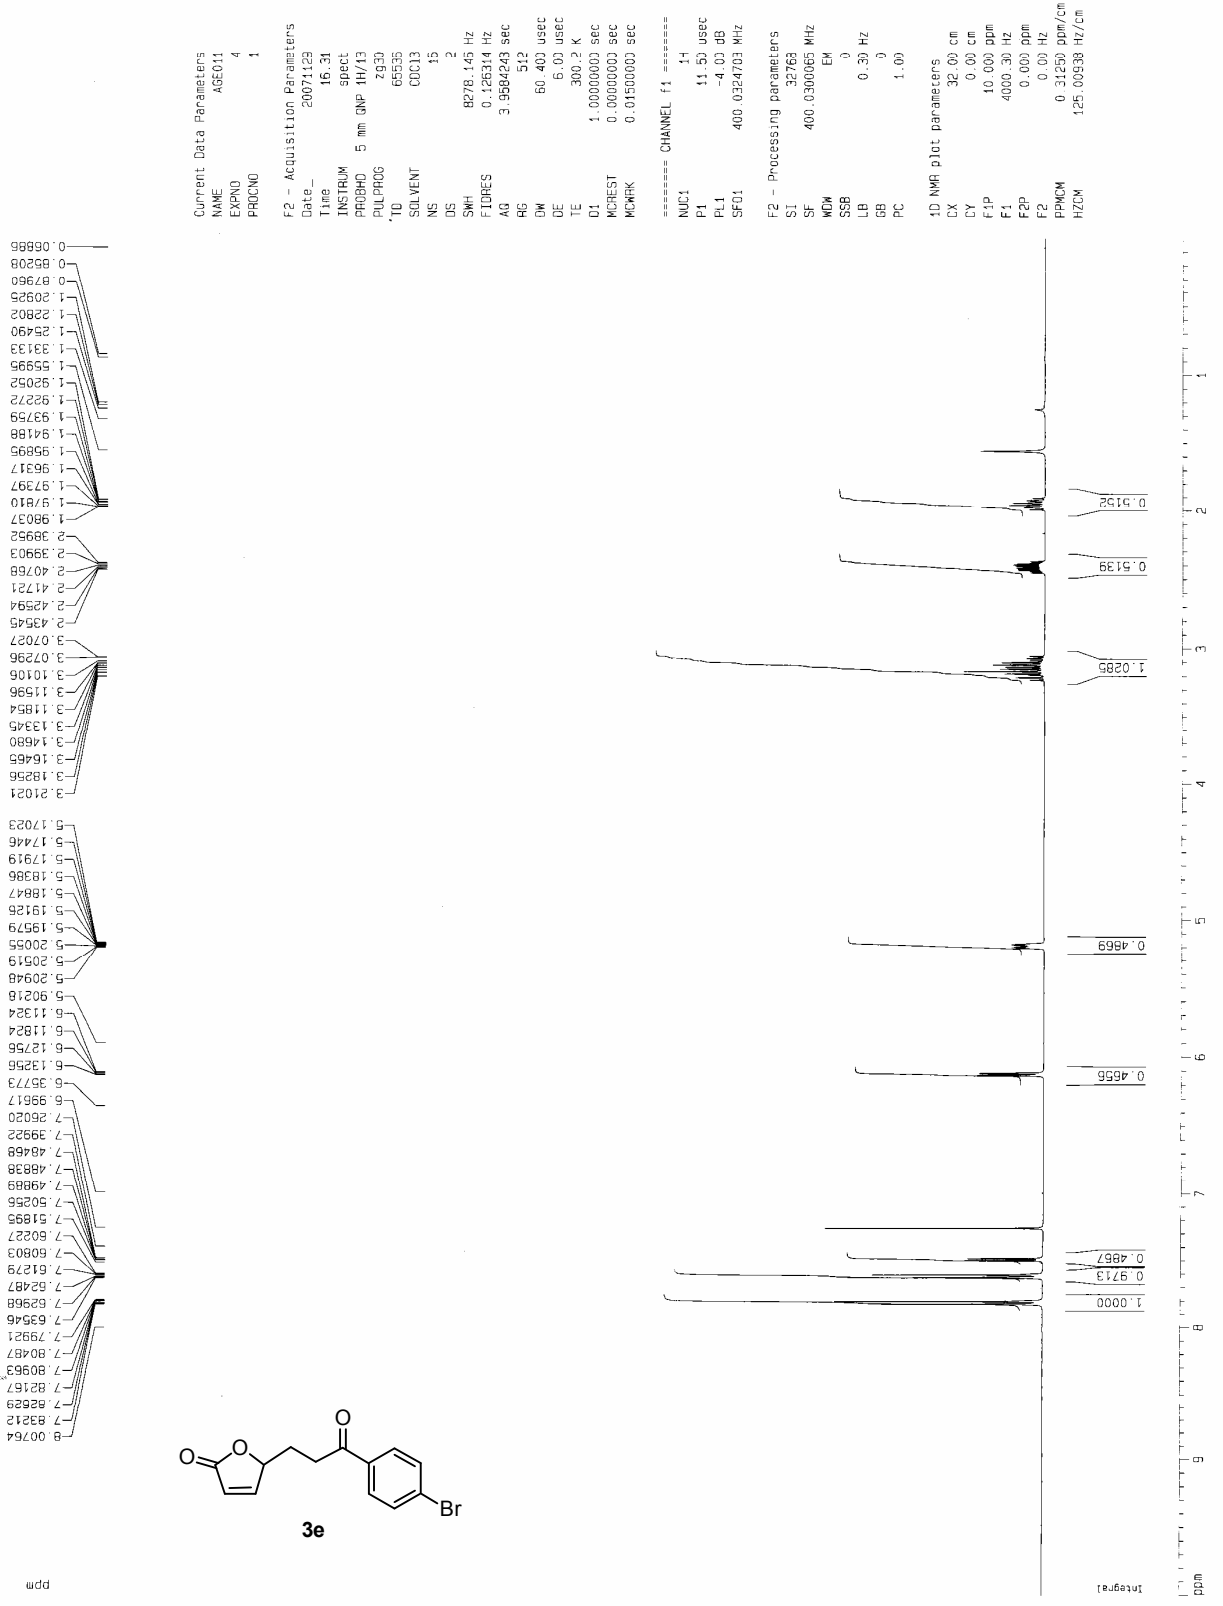



DPX400 carbon

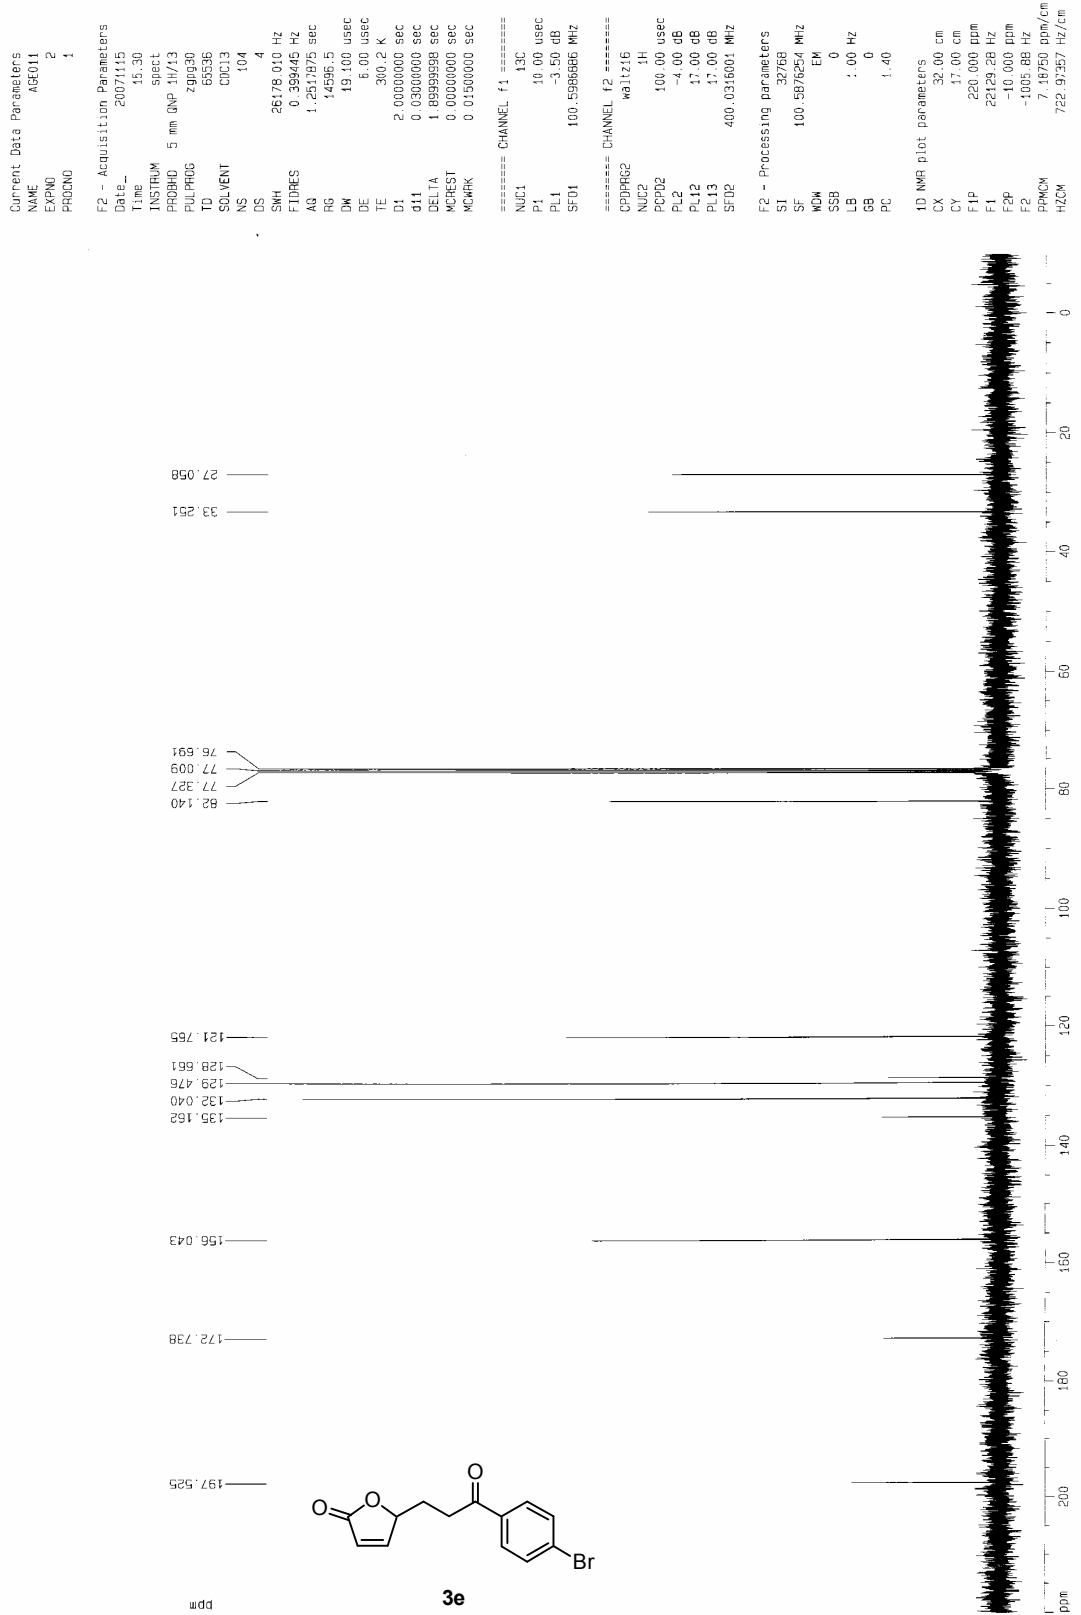

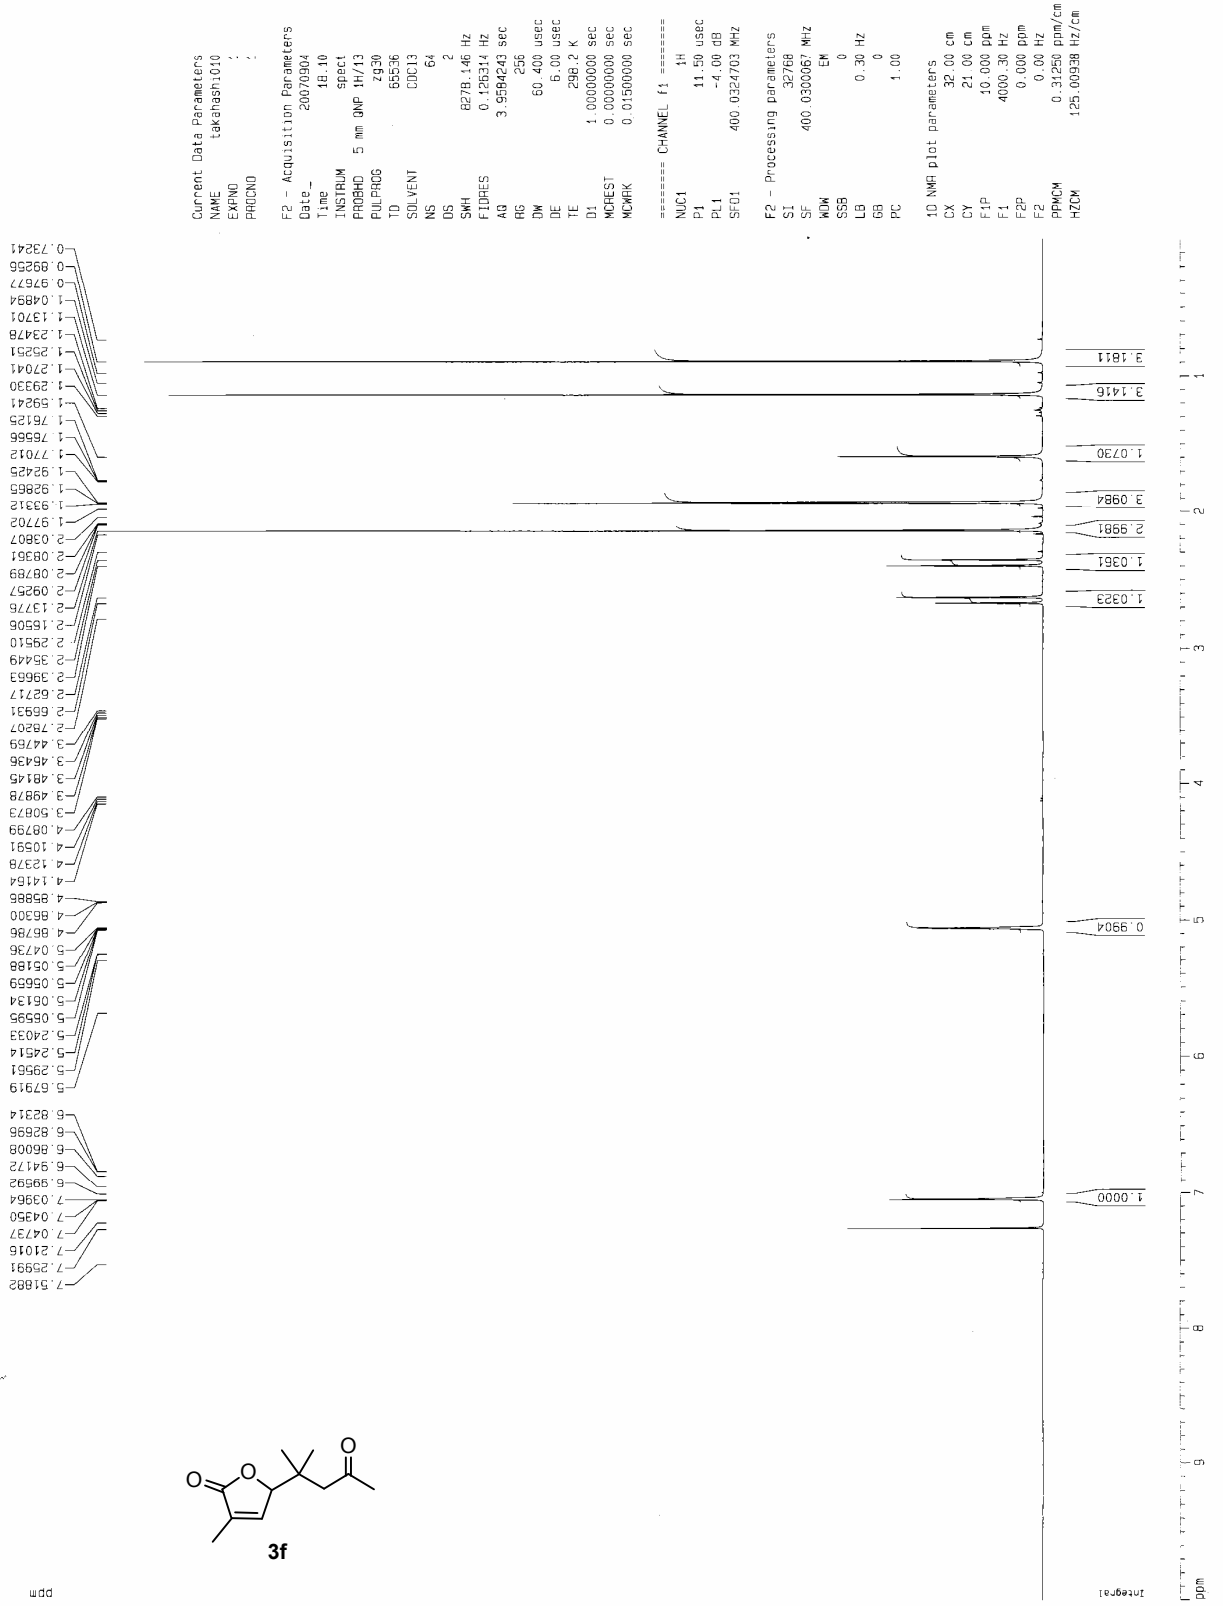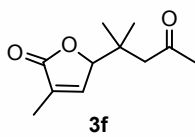

DPX400 carbon

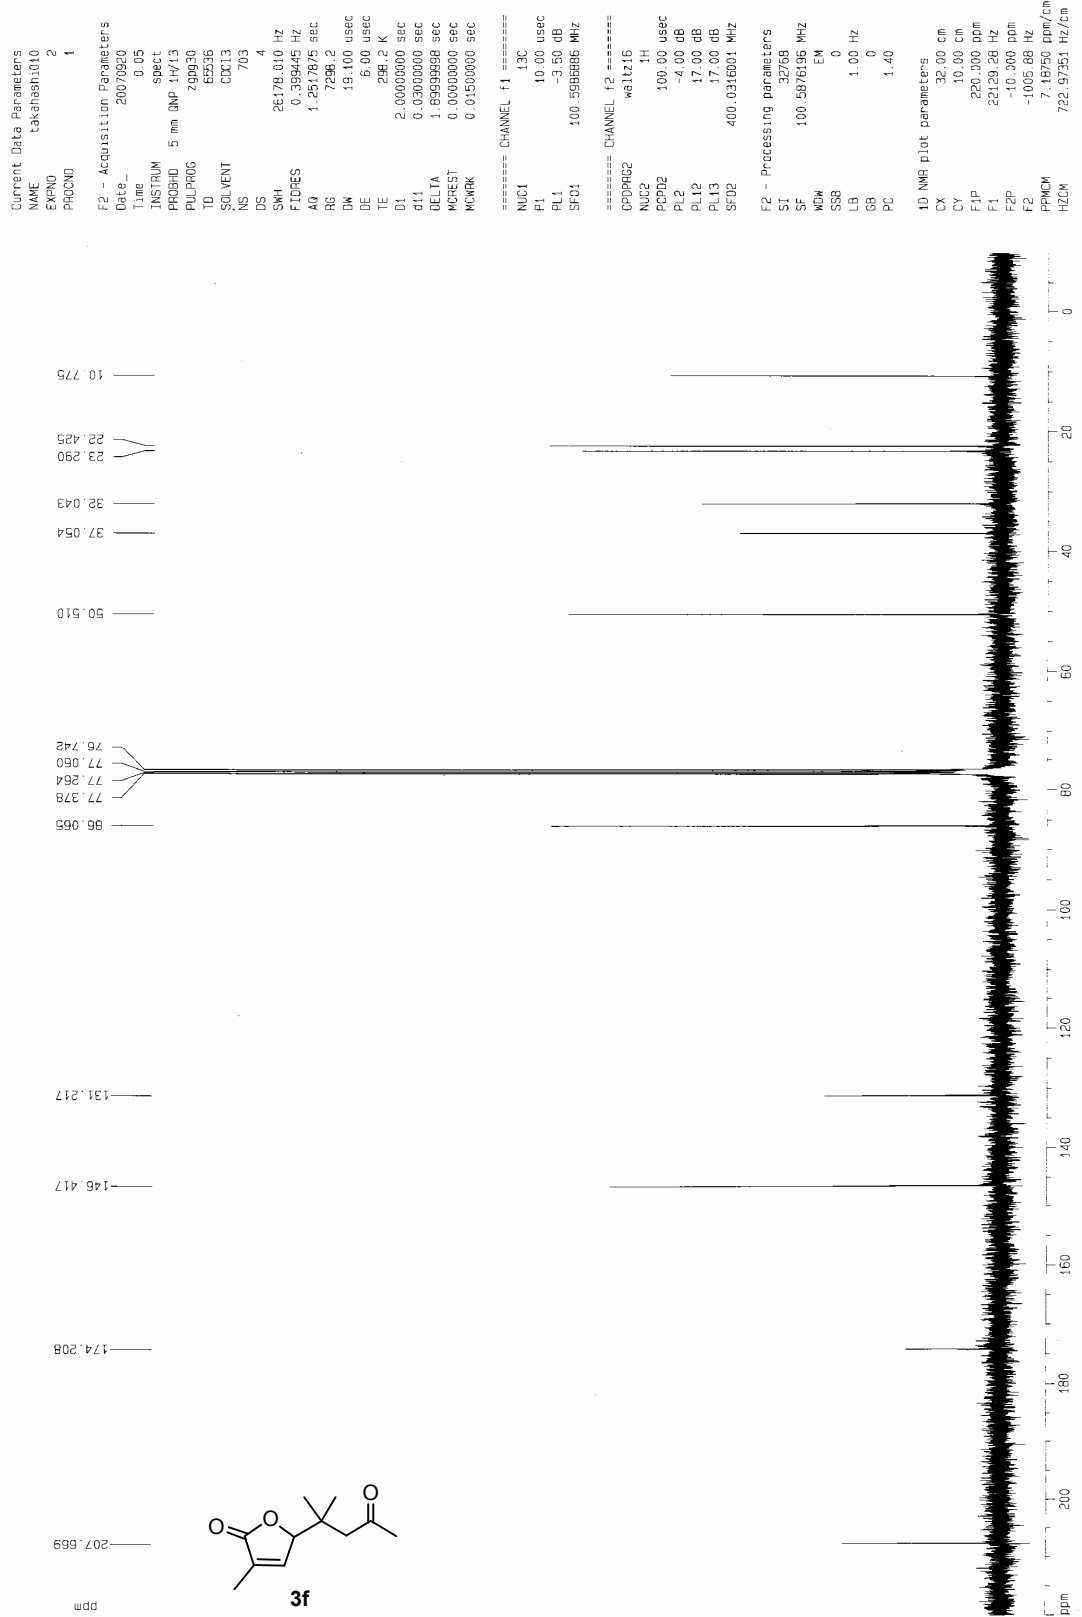

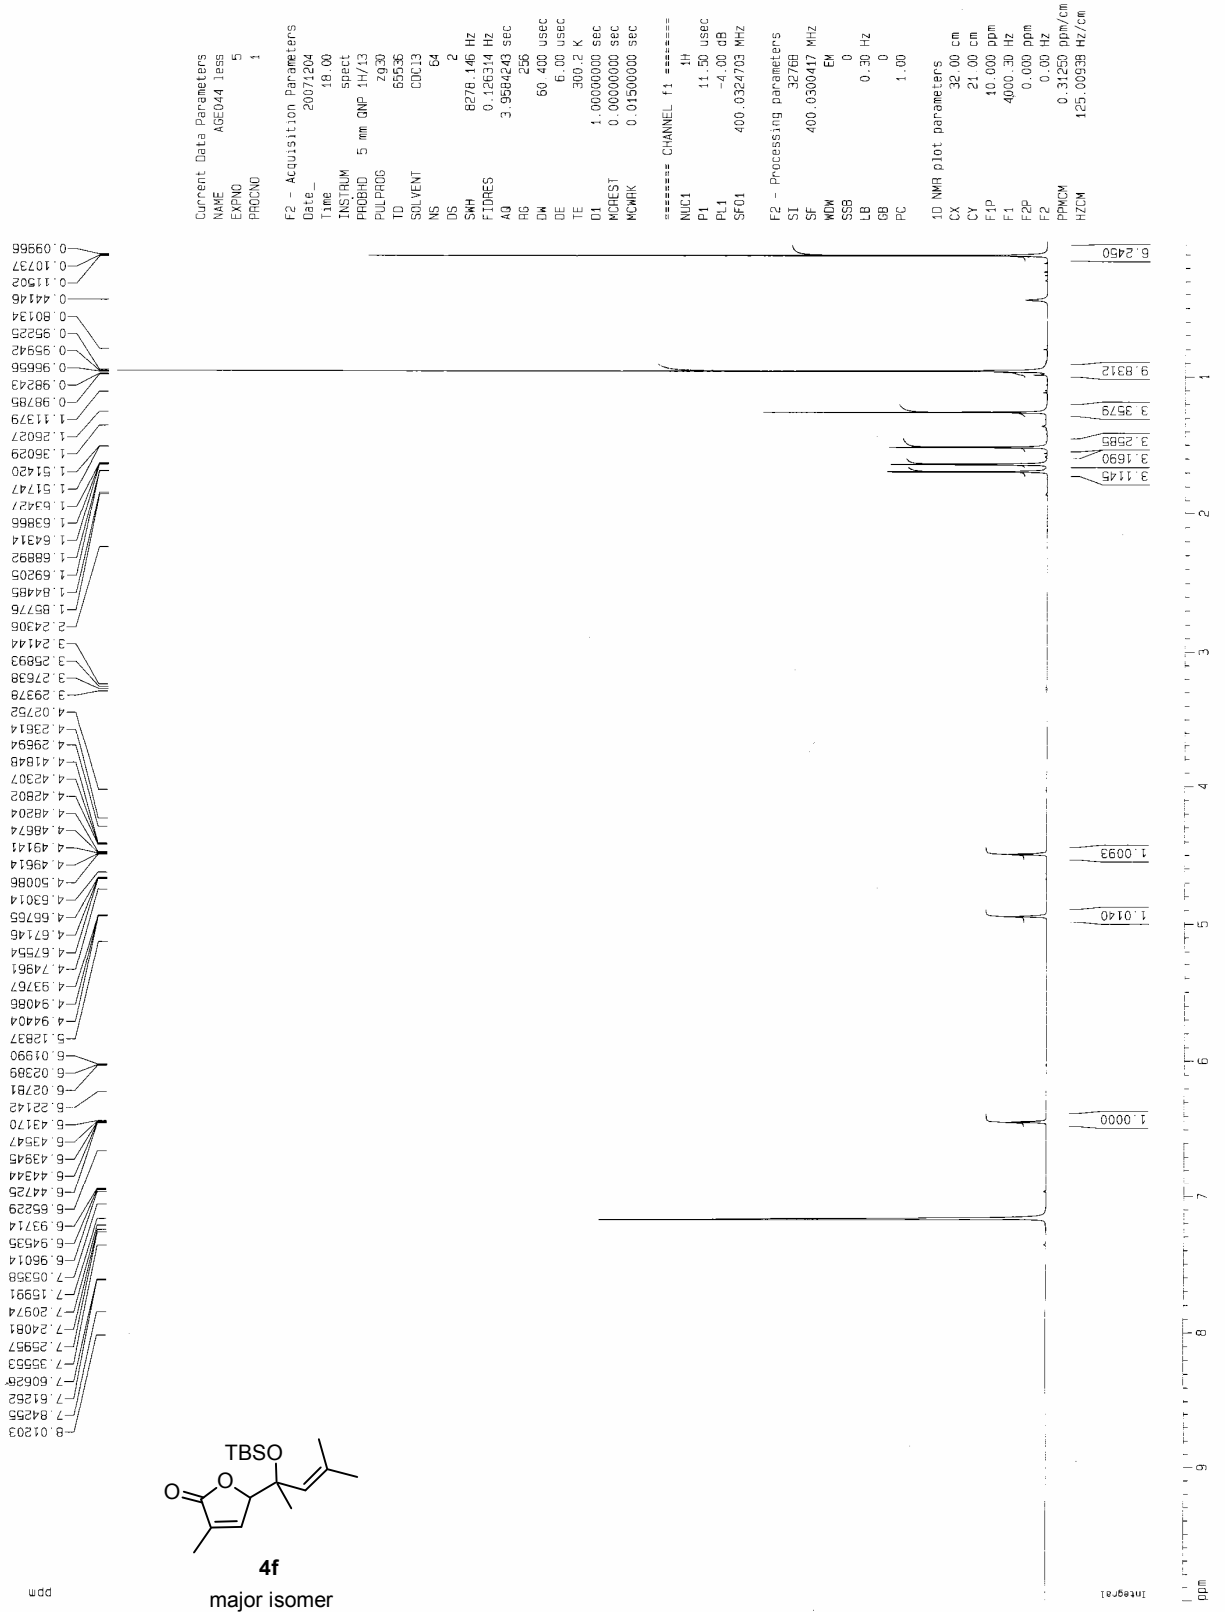

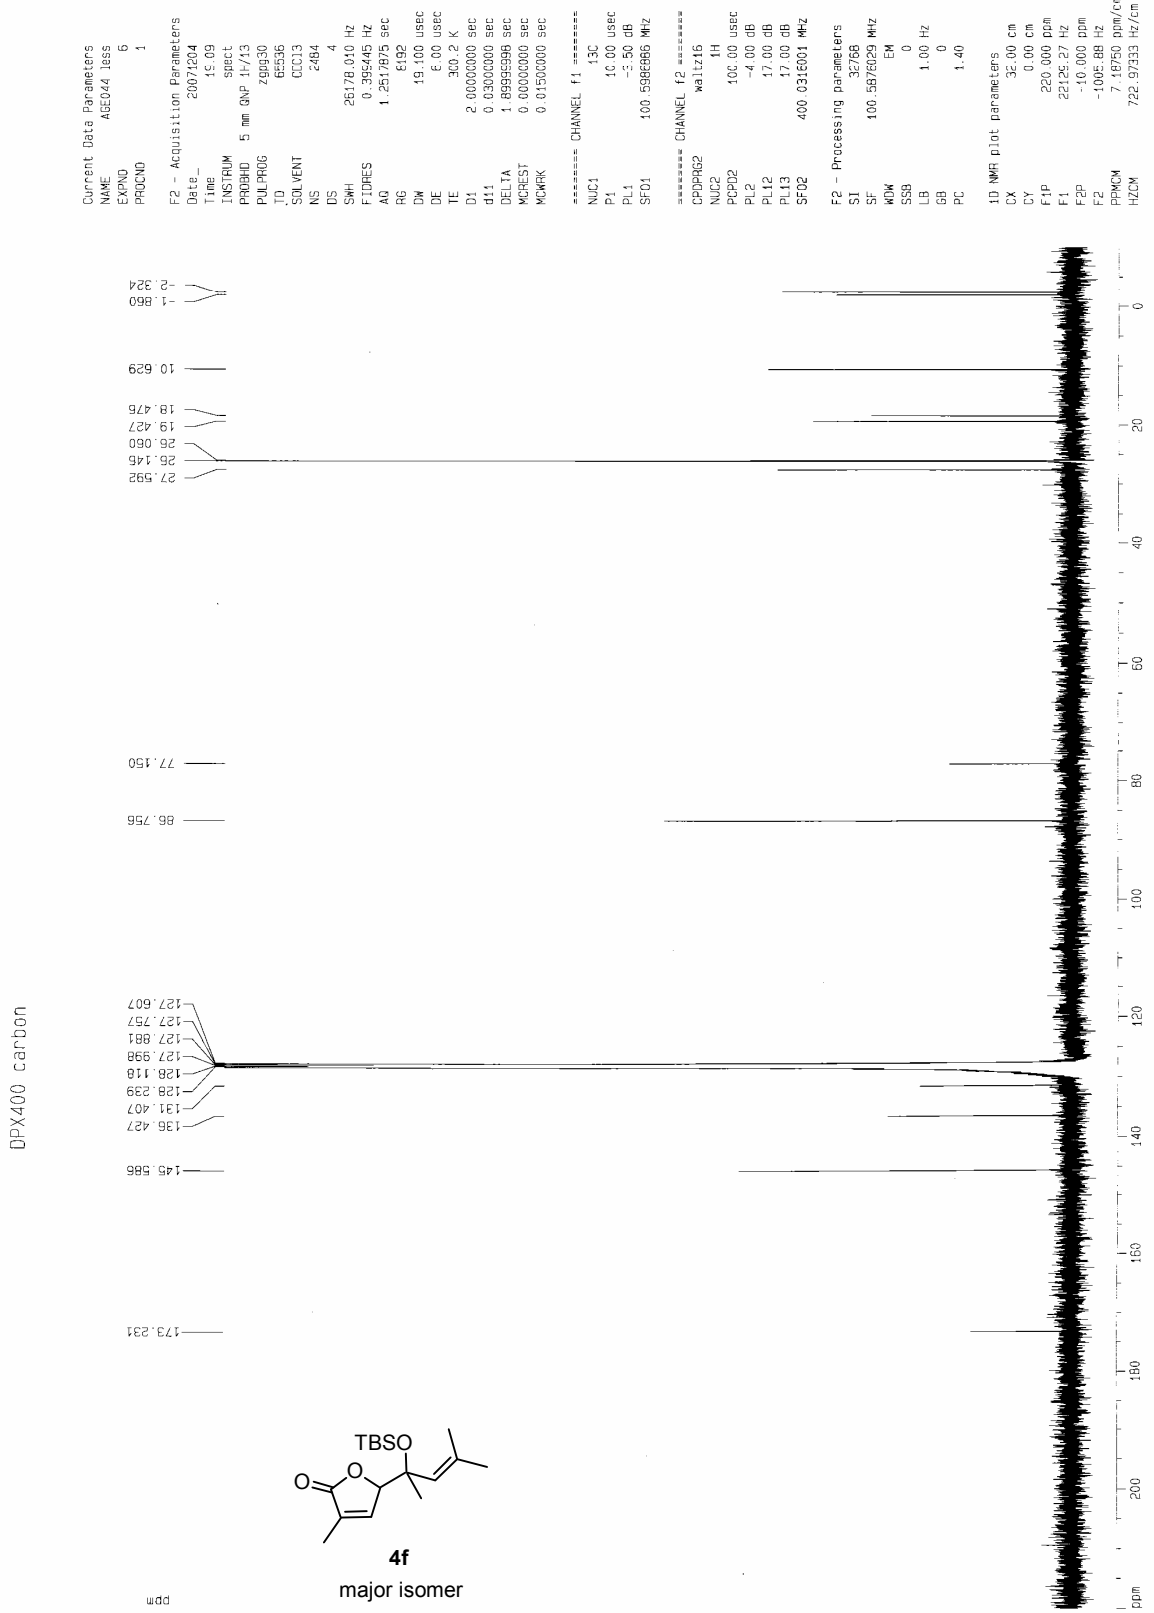

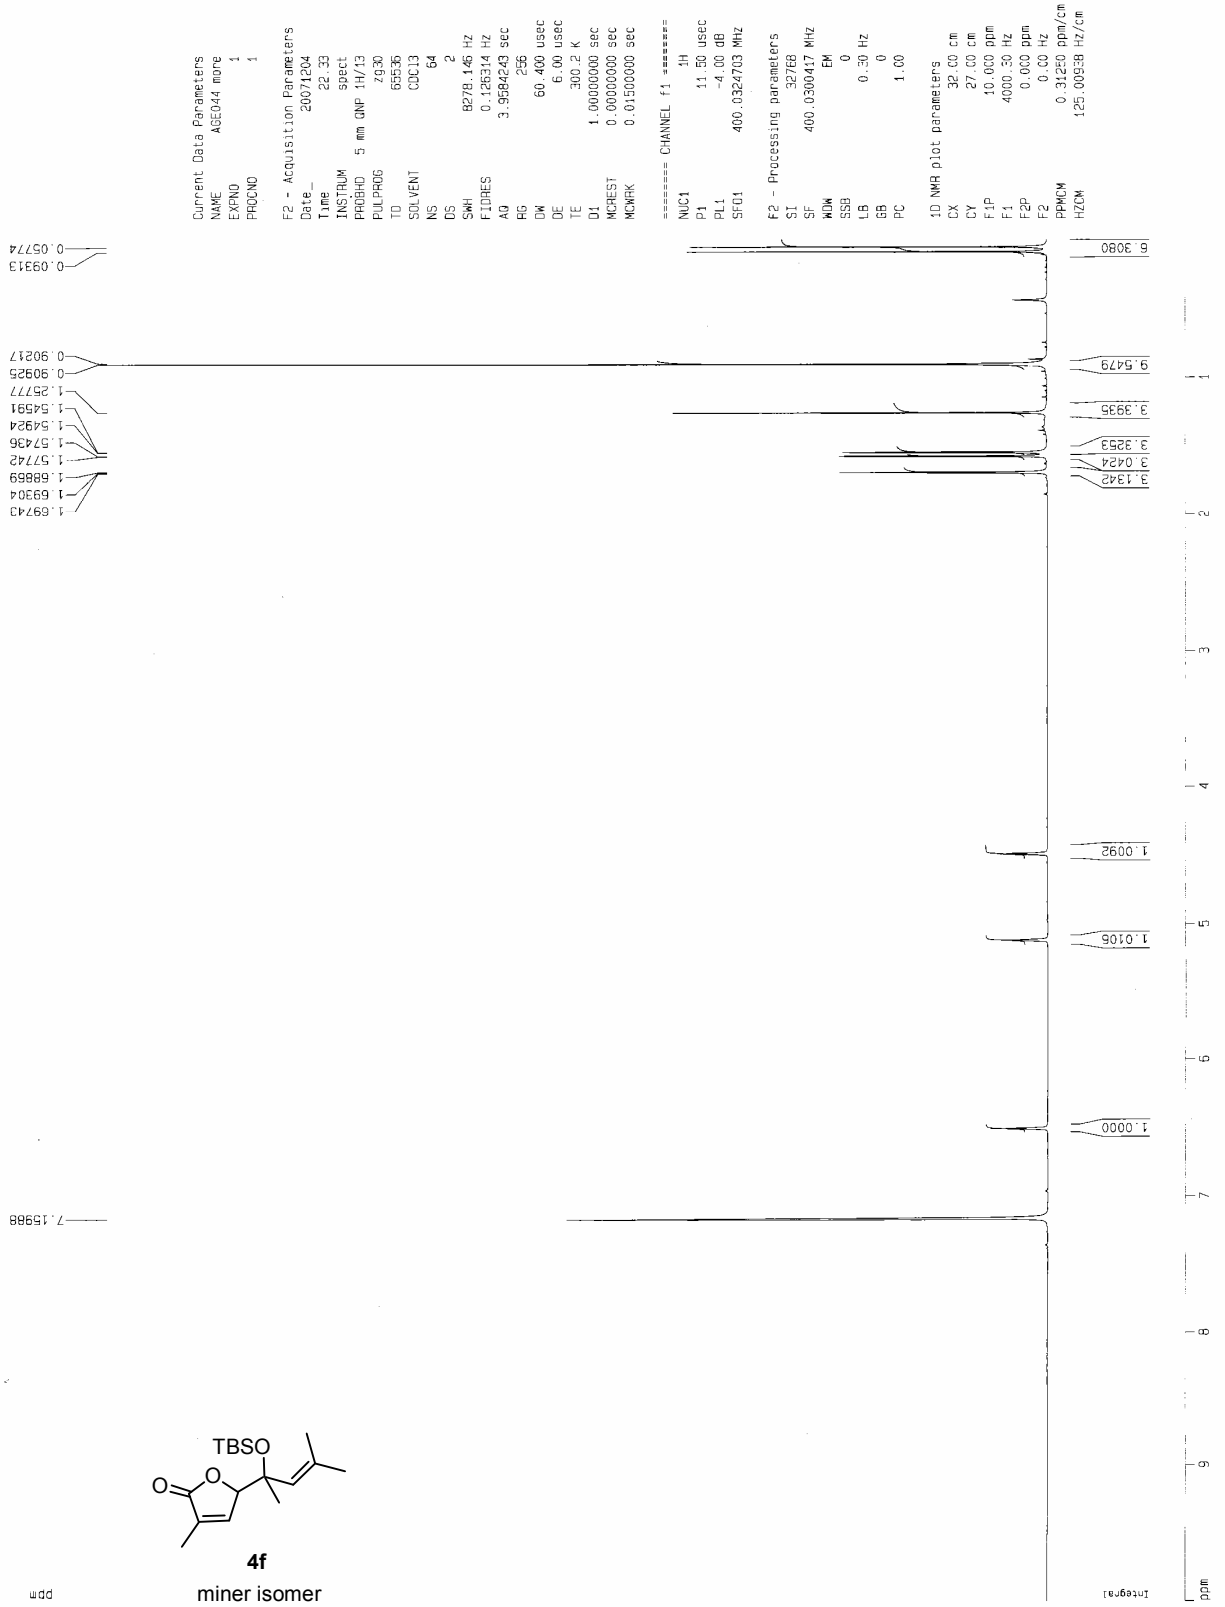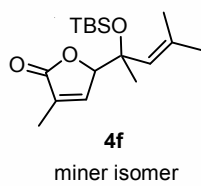

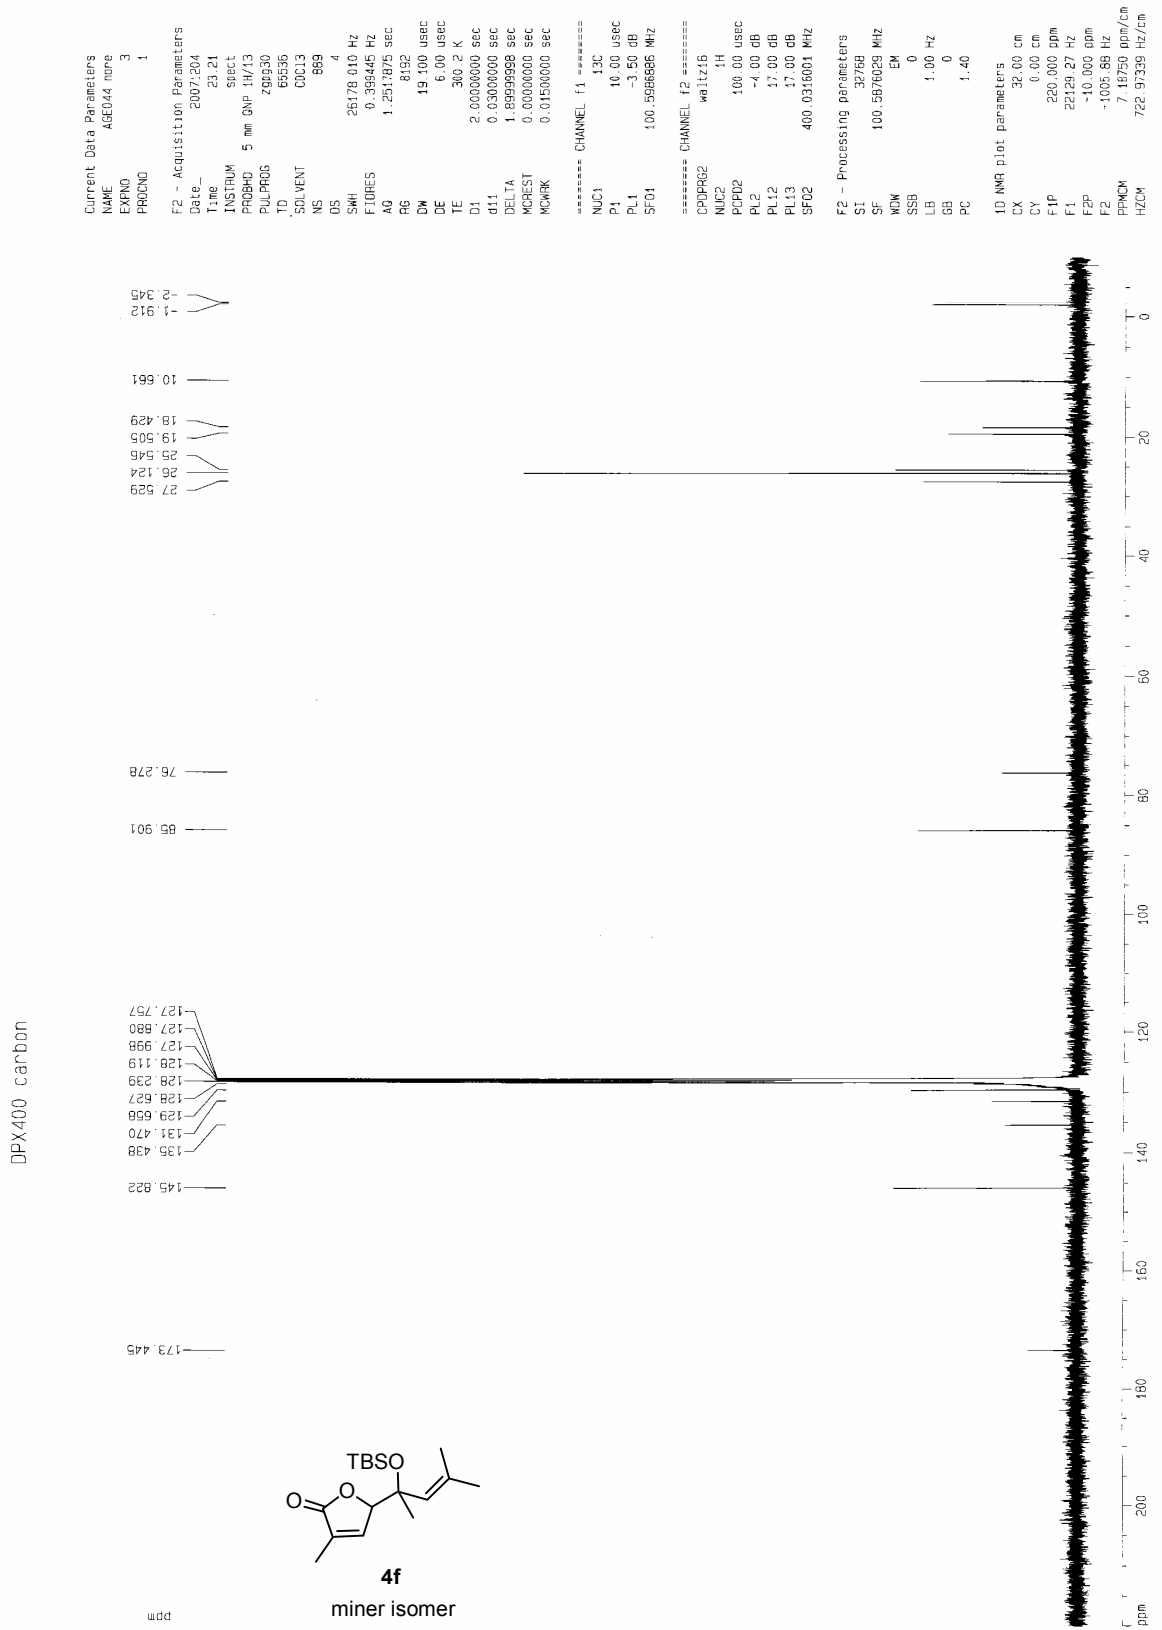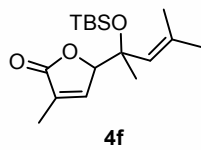

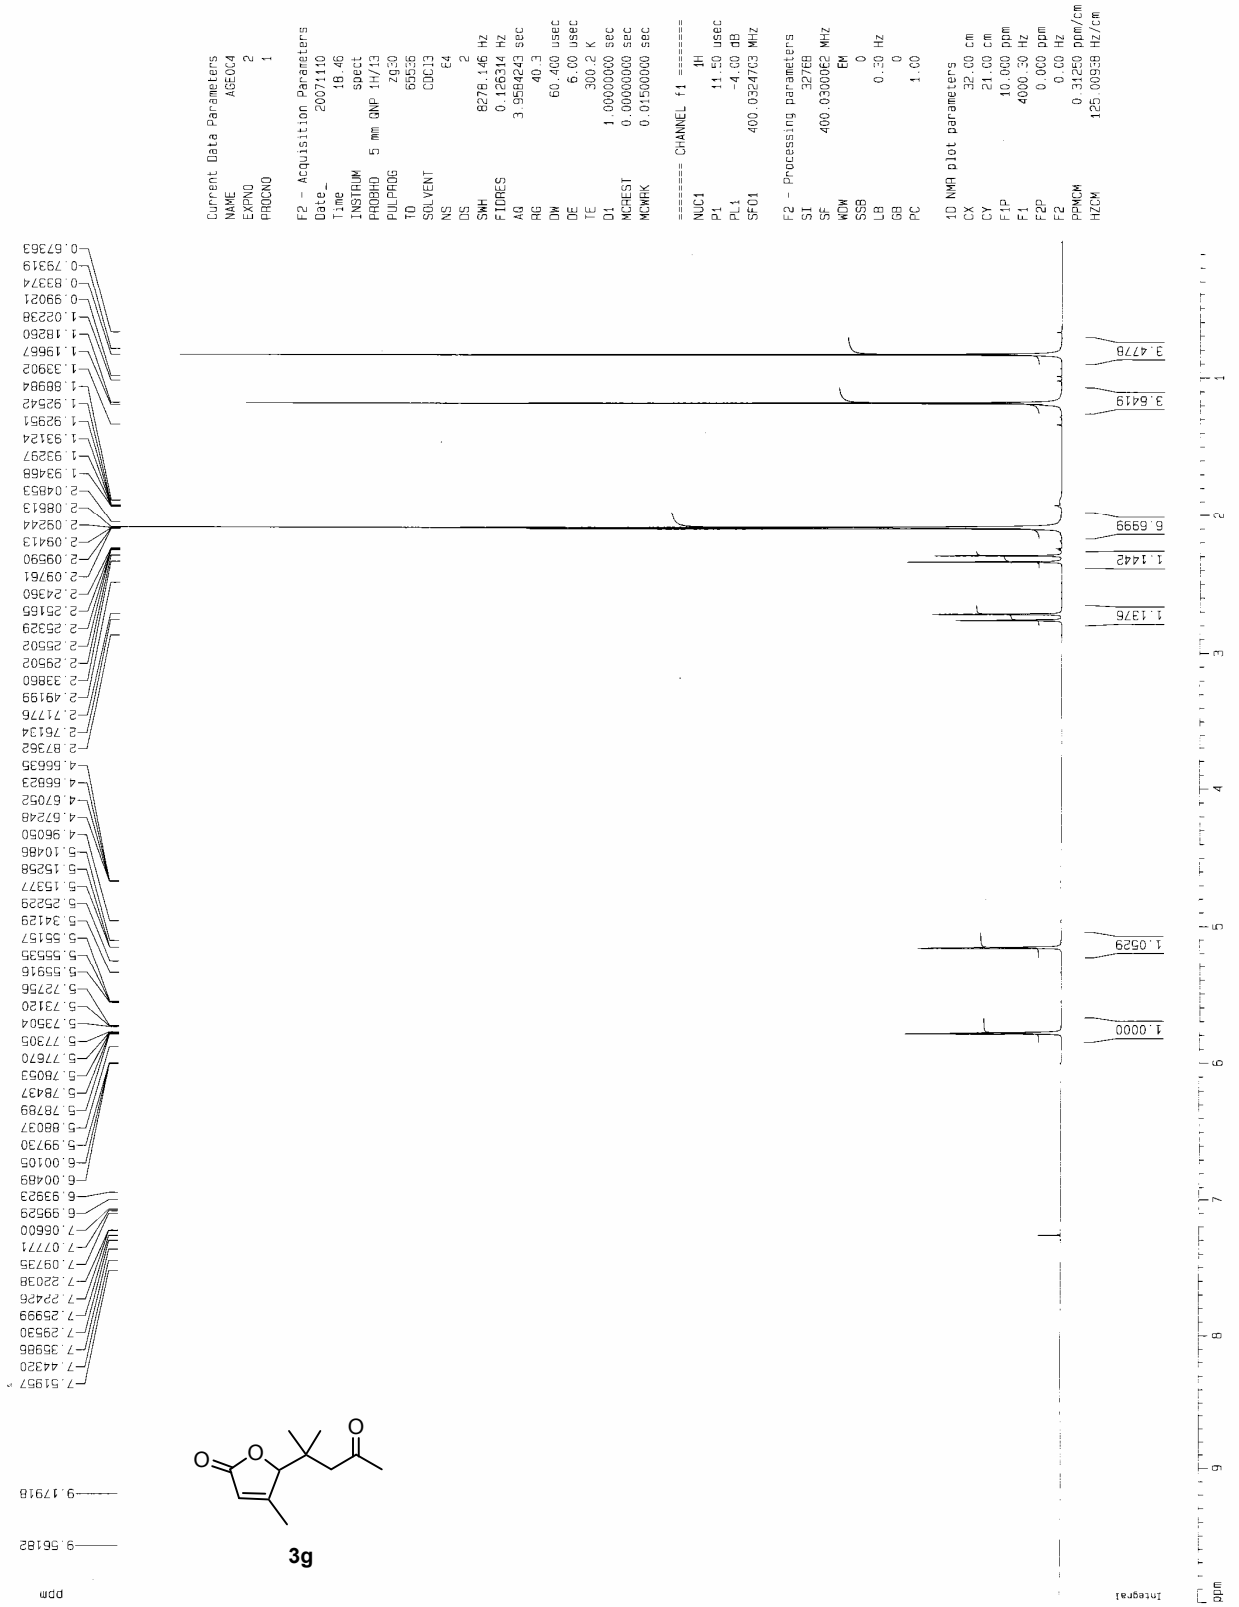



DPX400 carbon

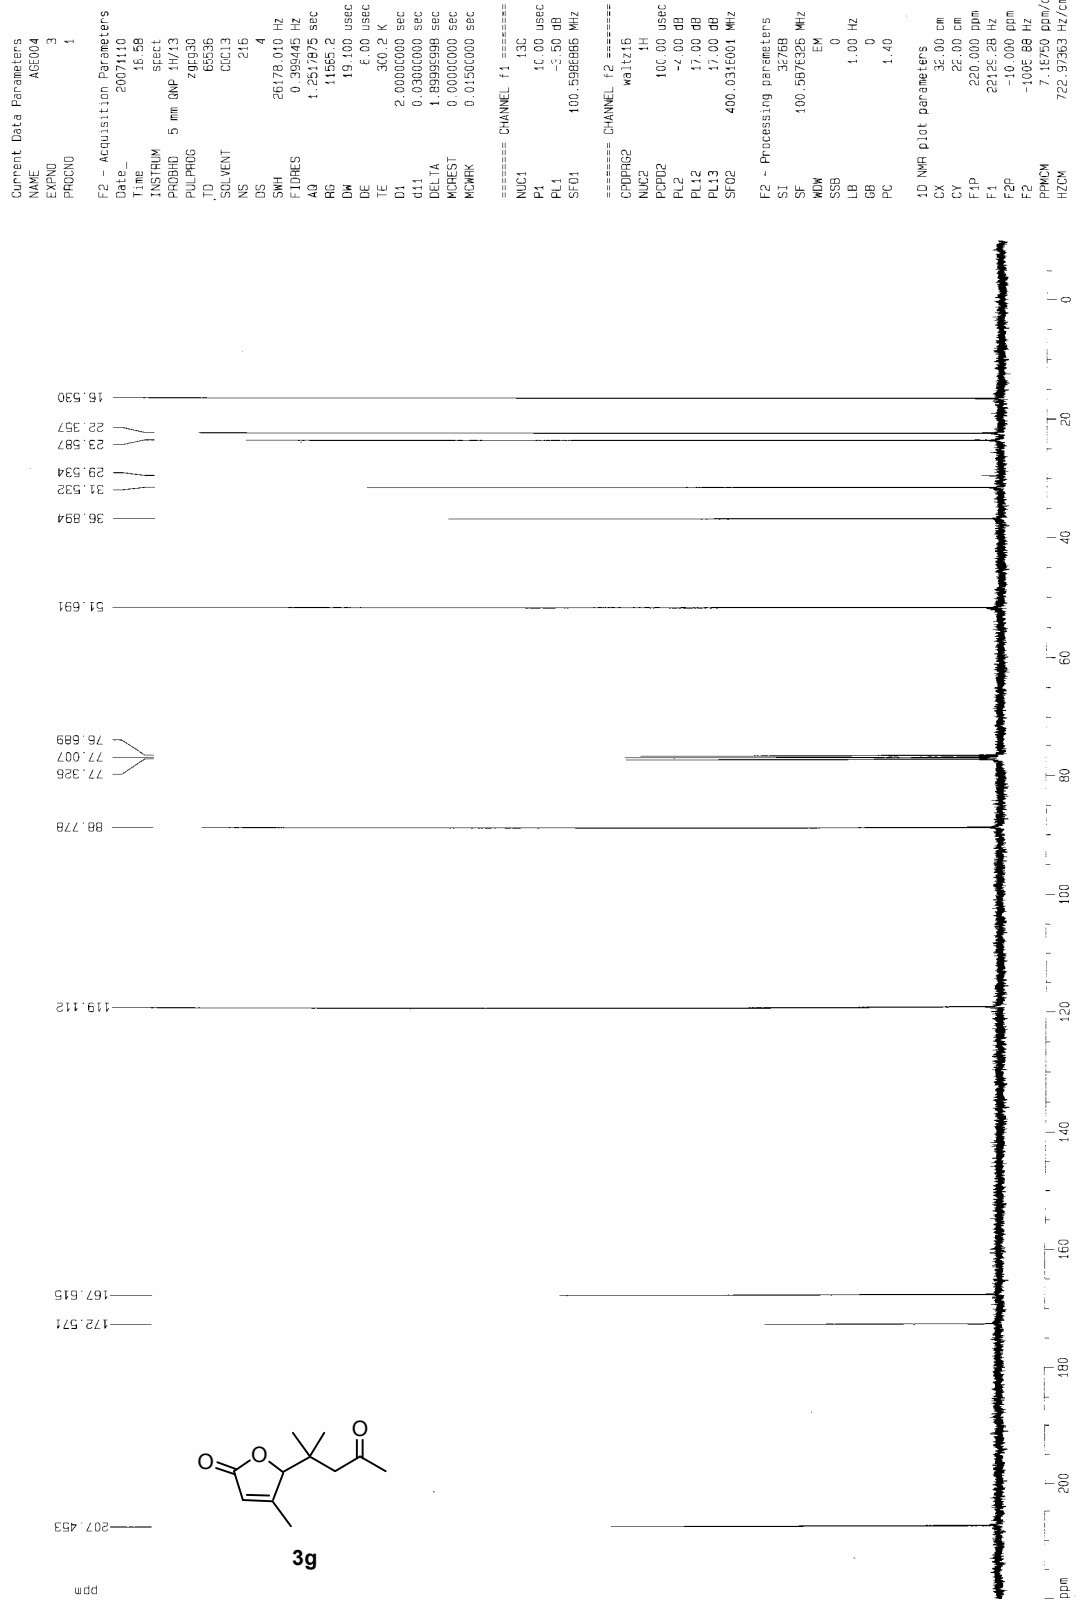

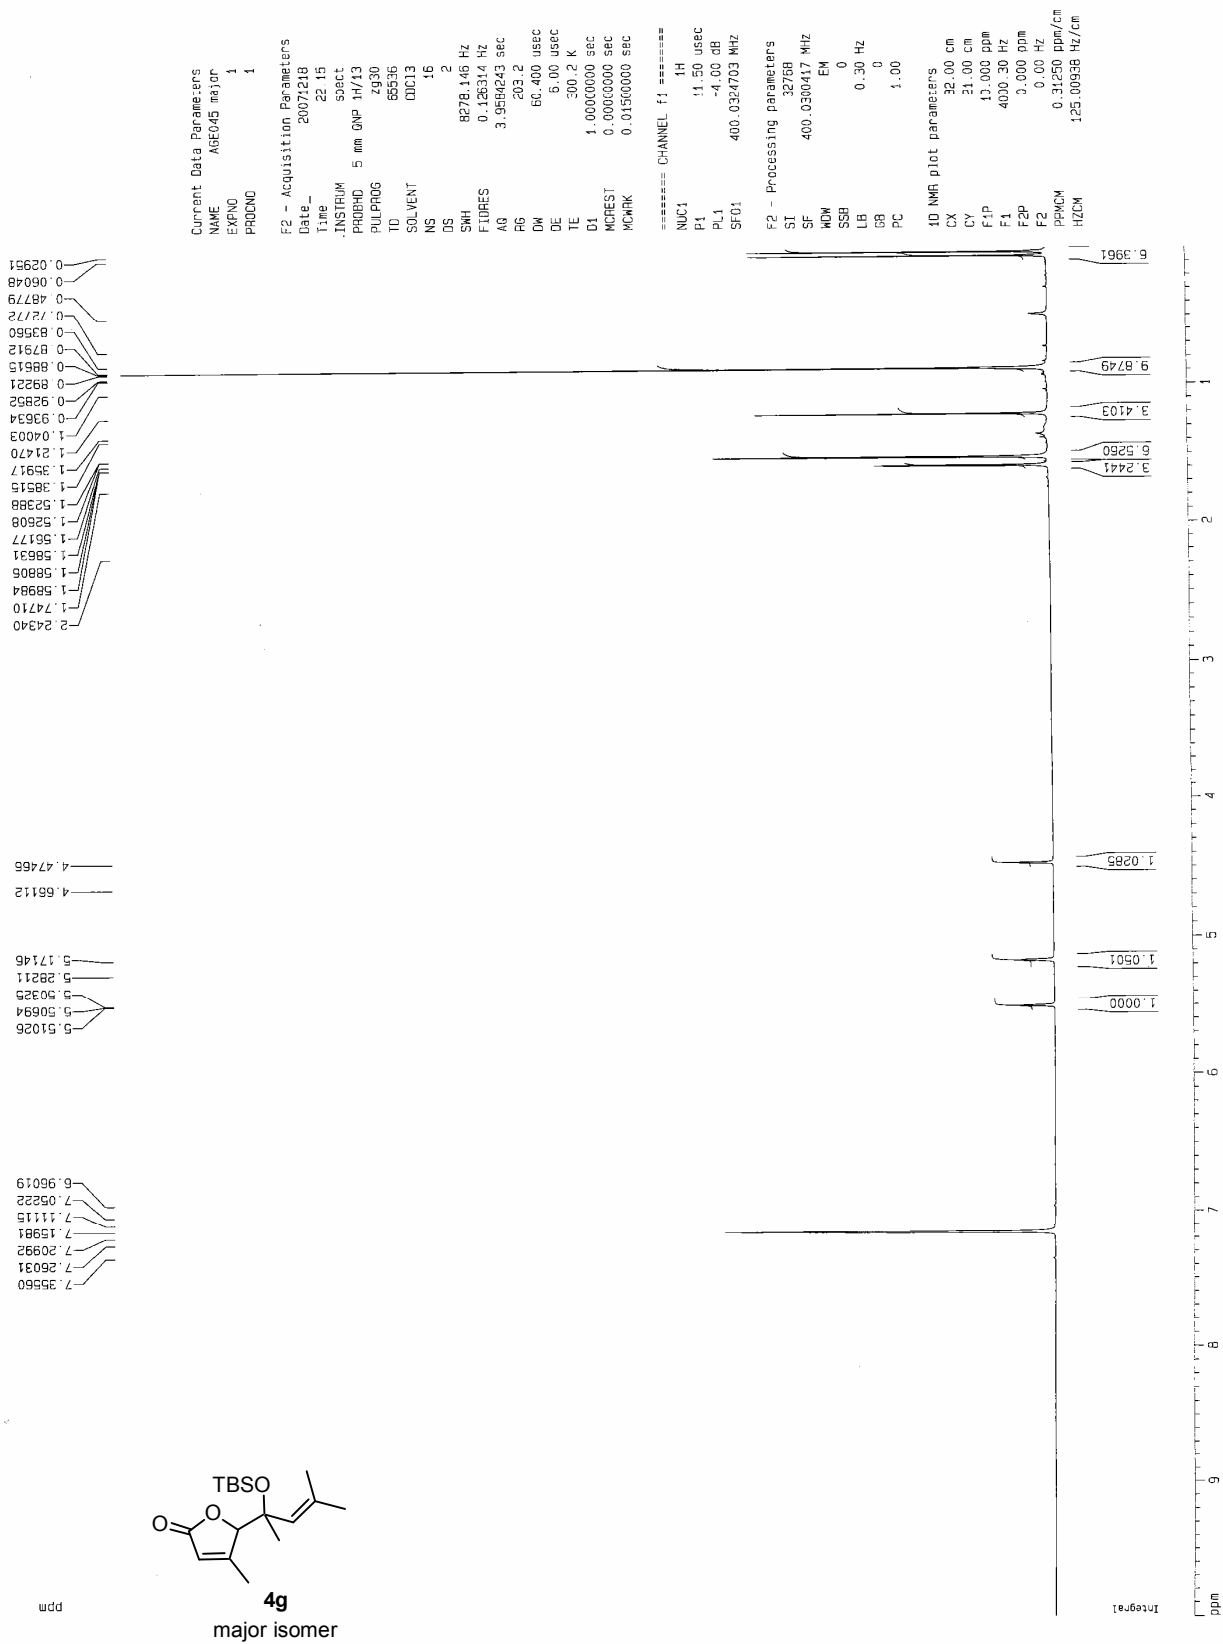

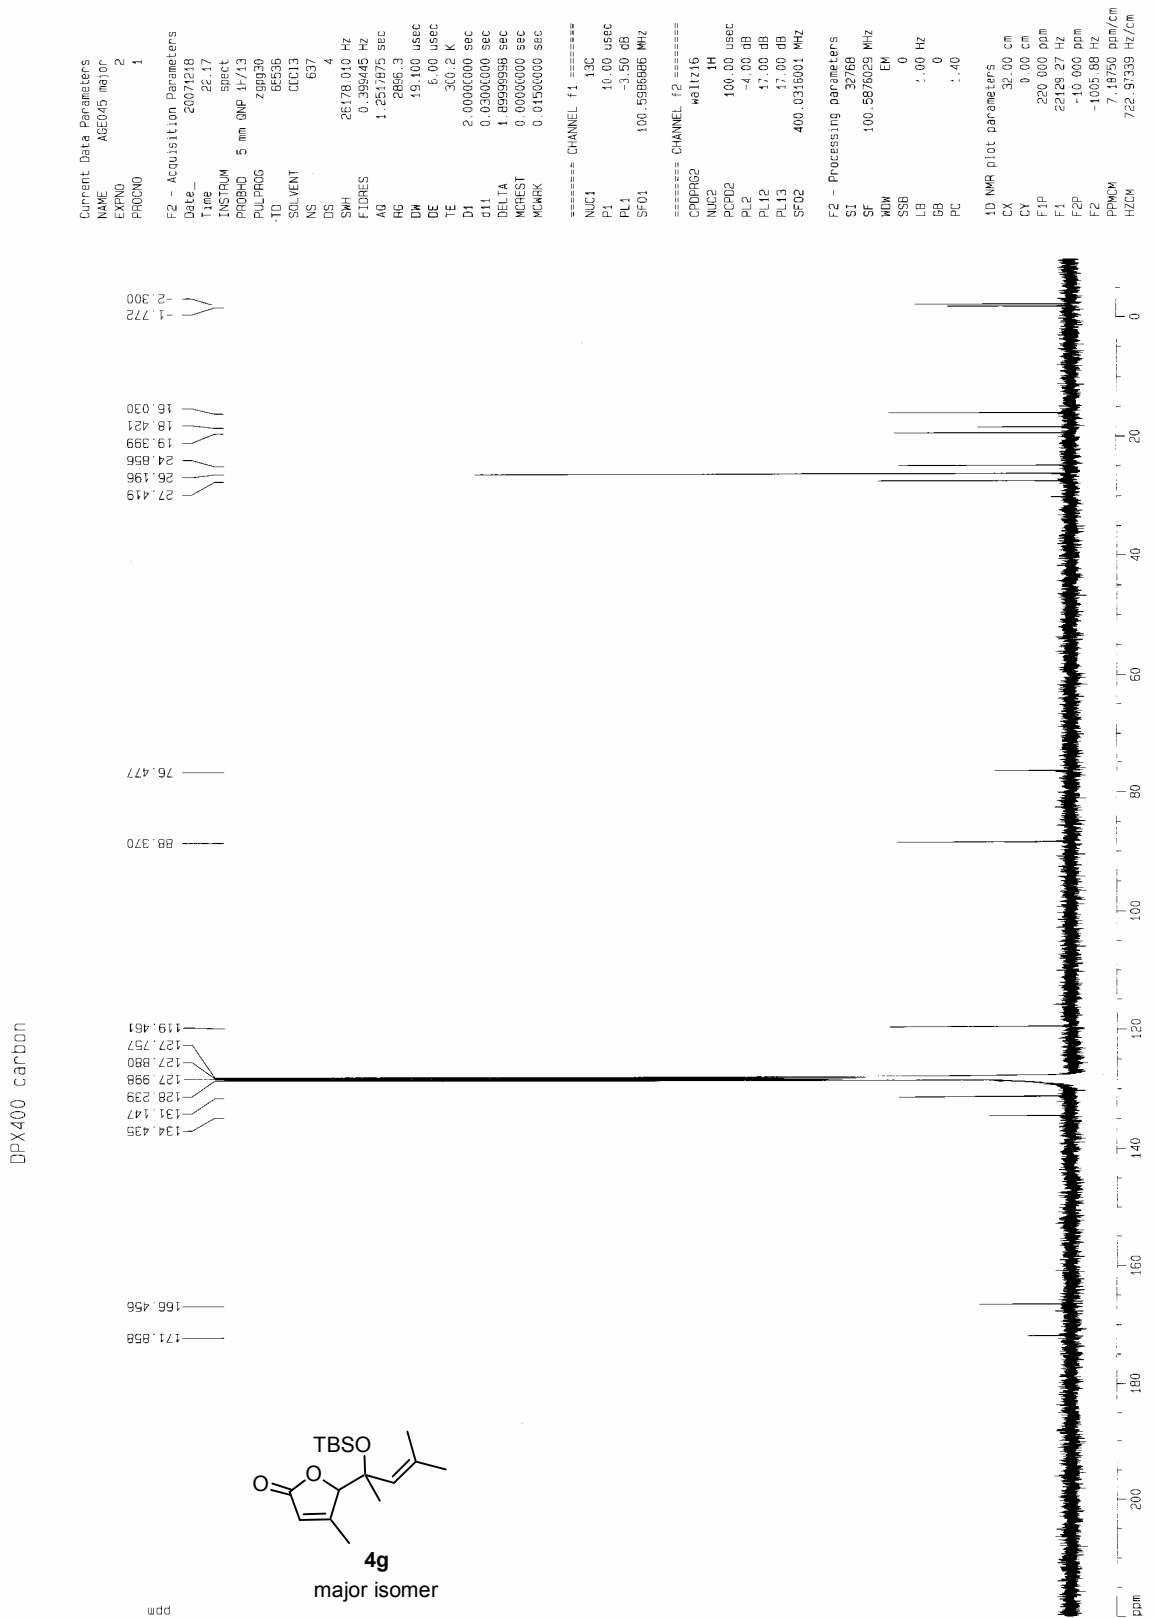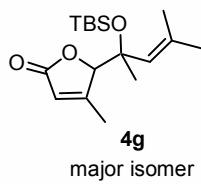

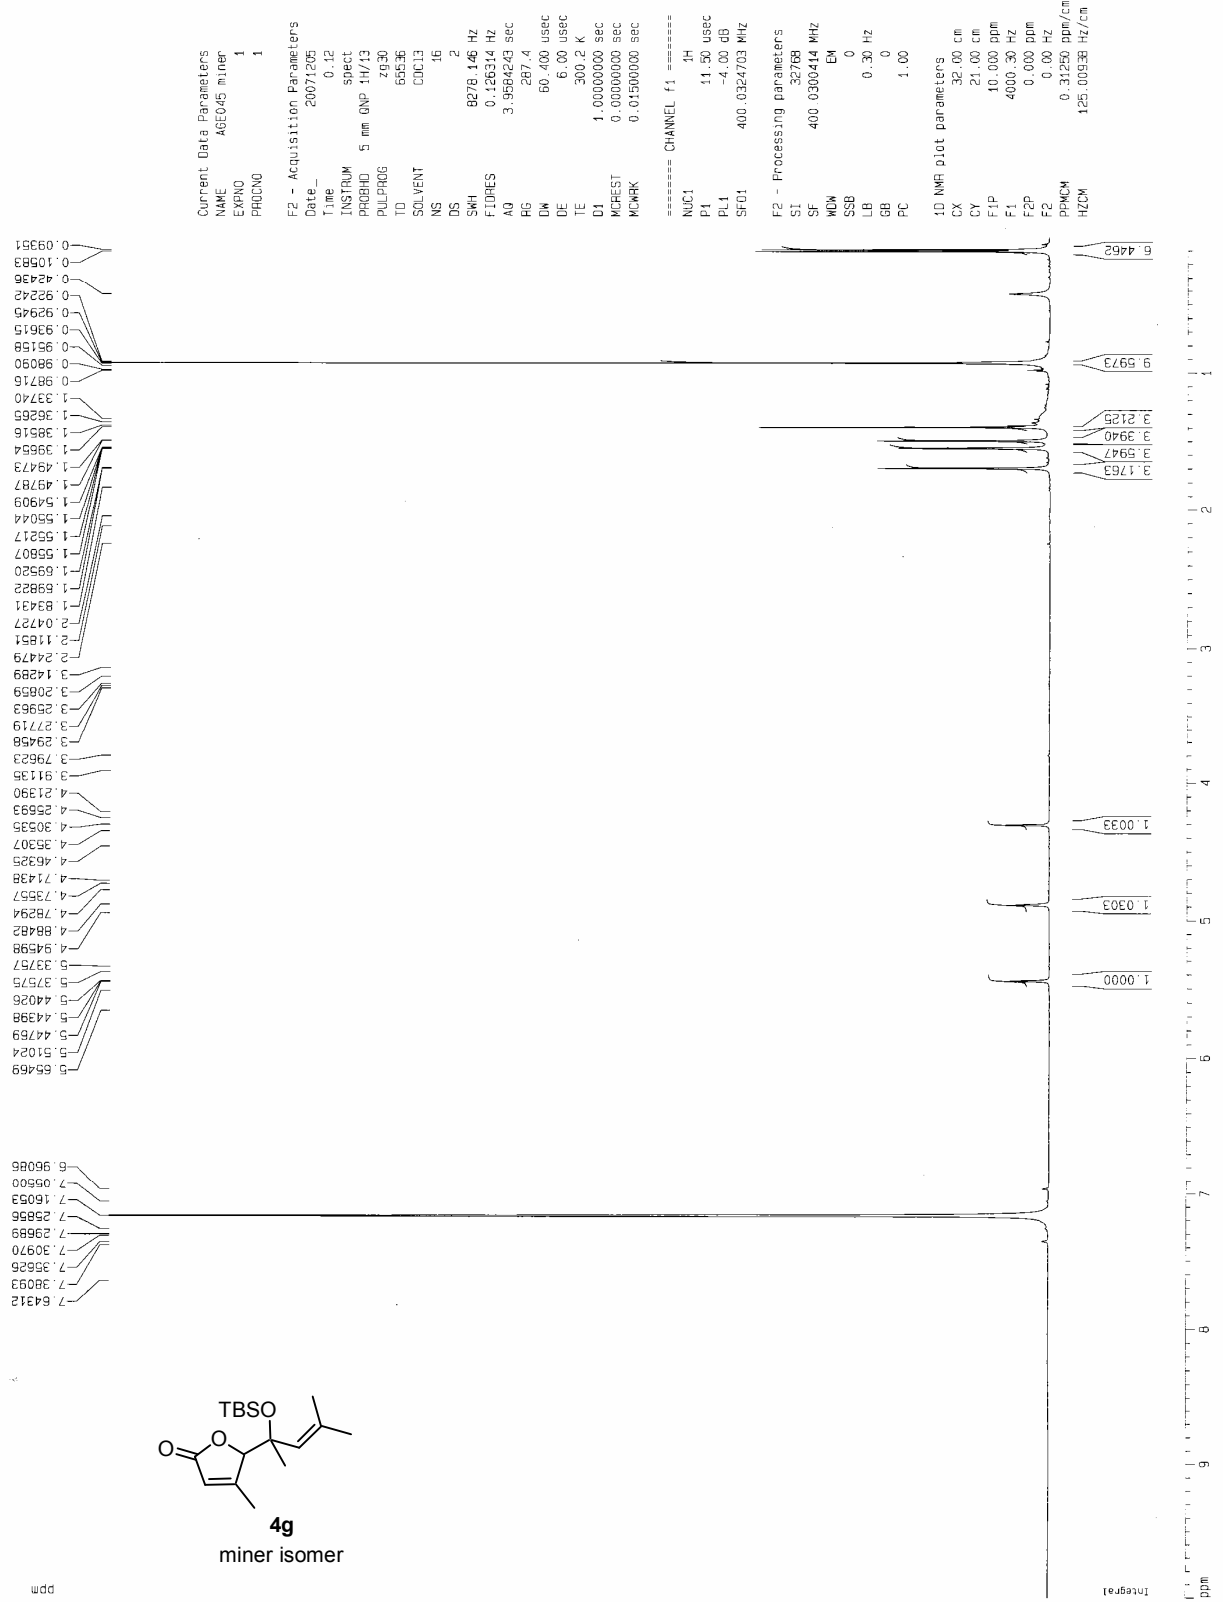

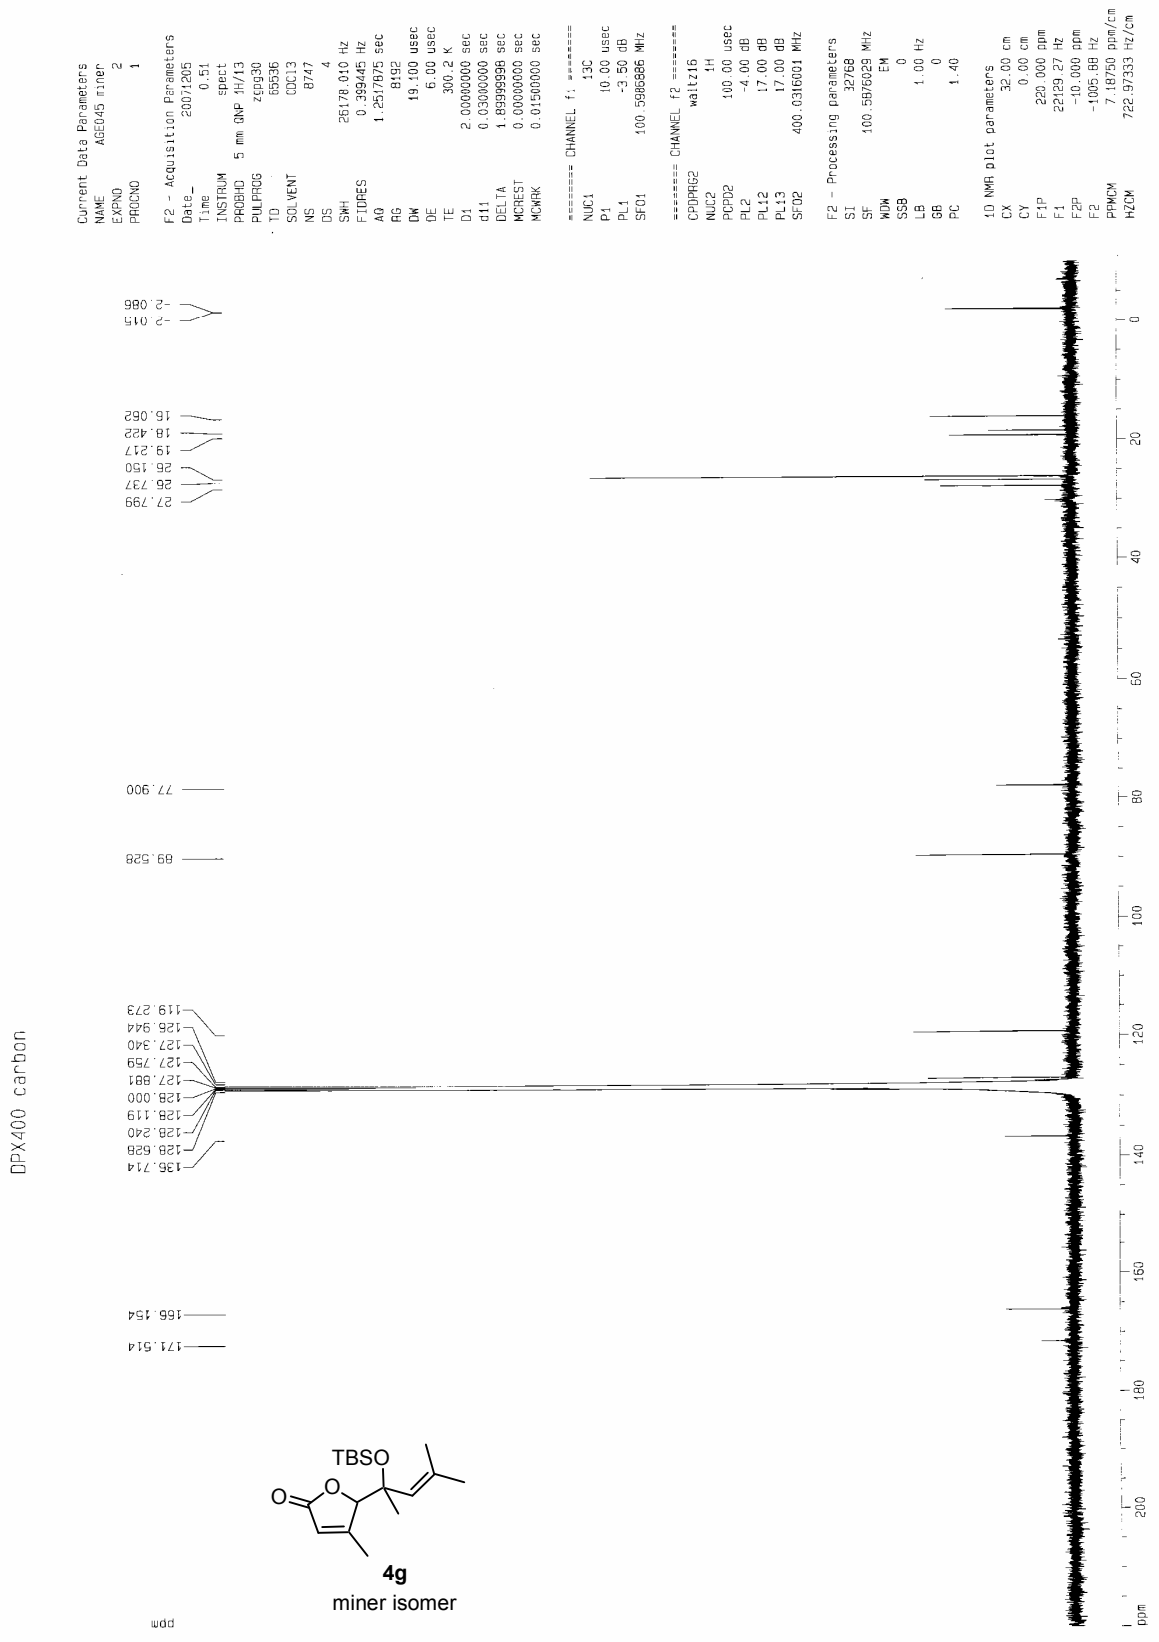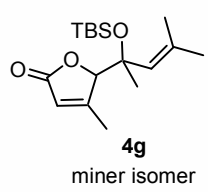

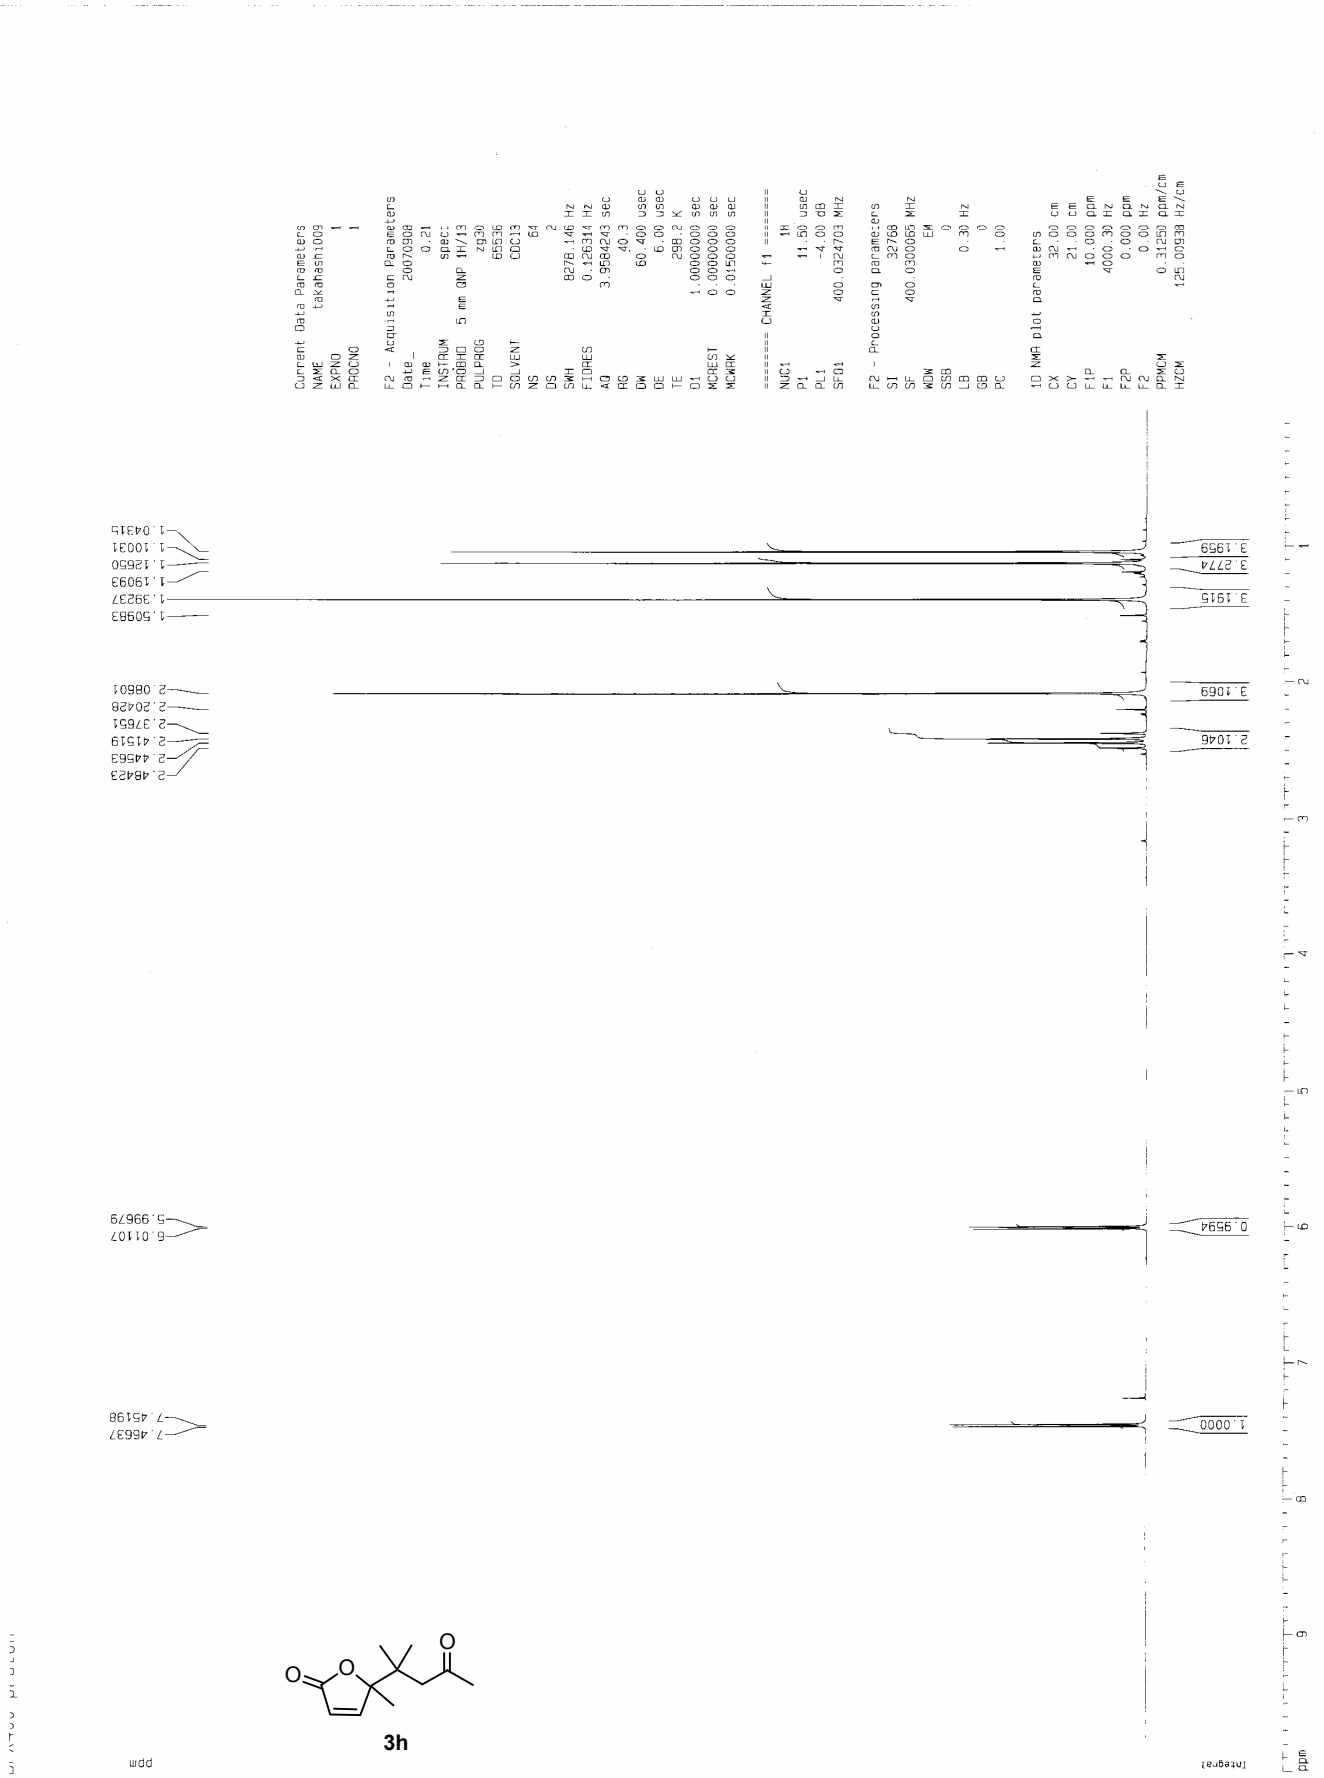

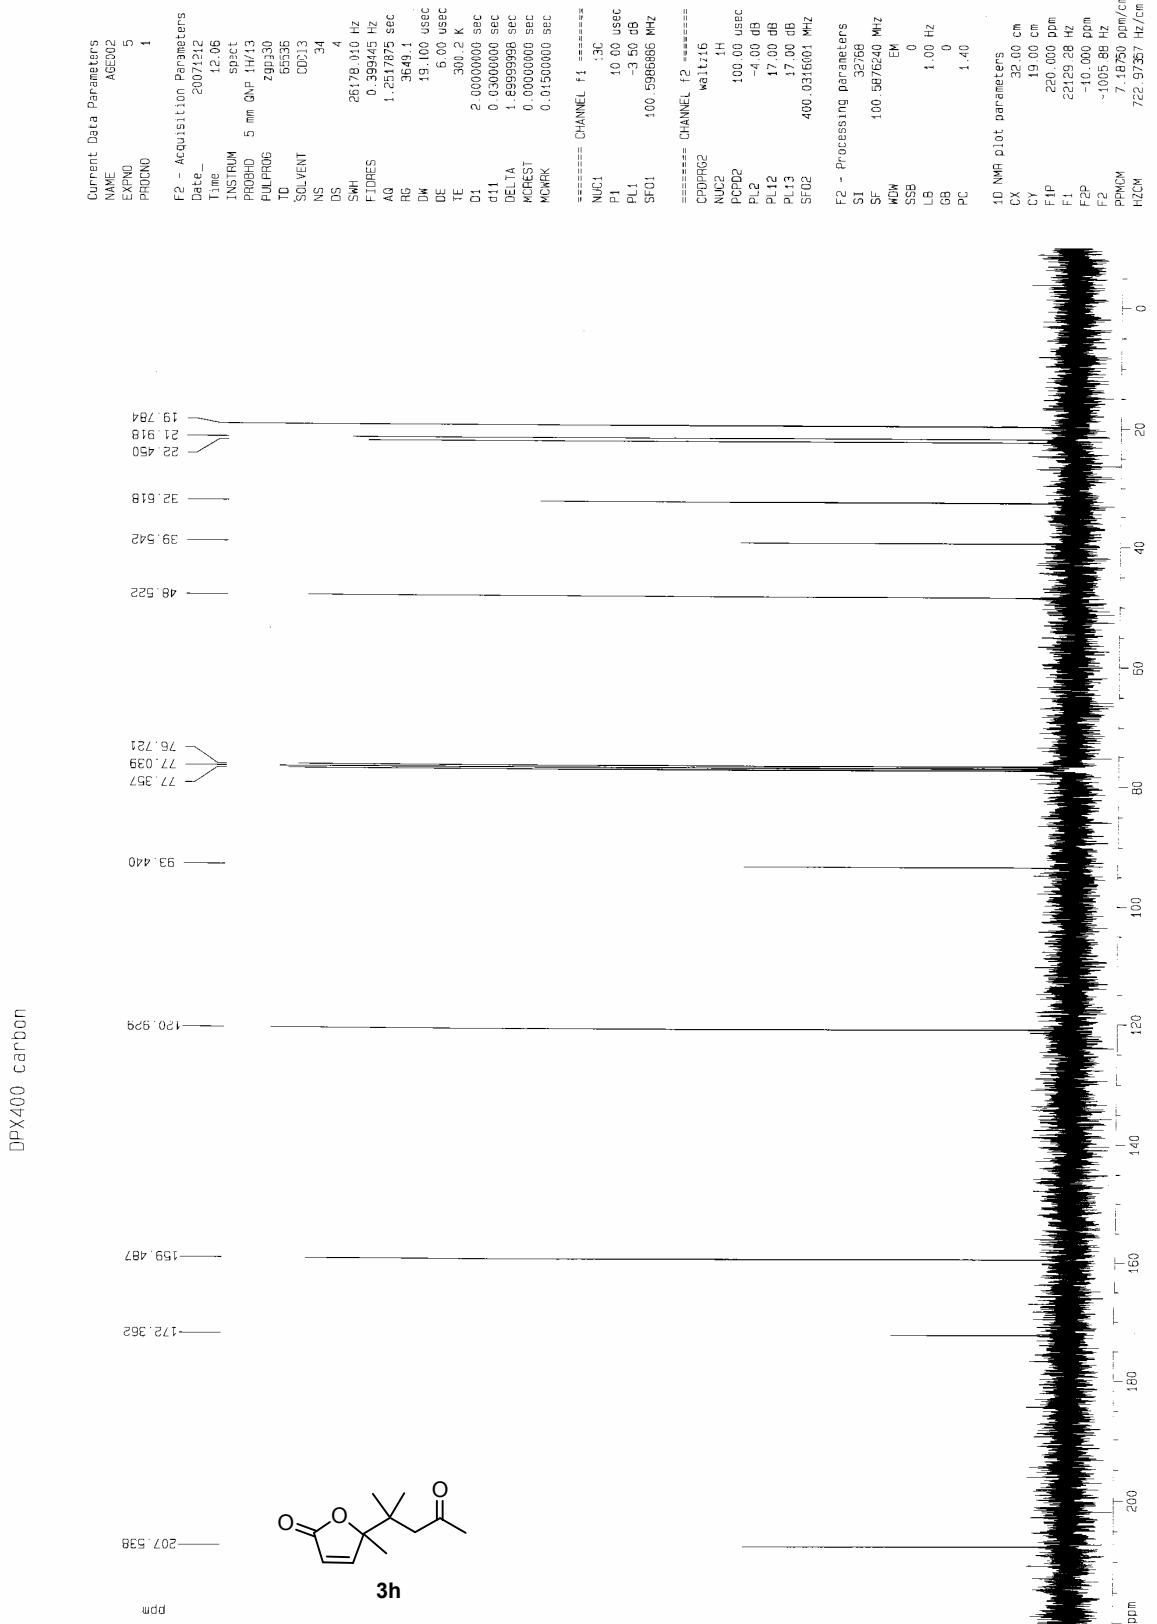

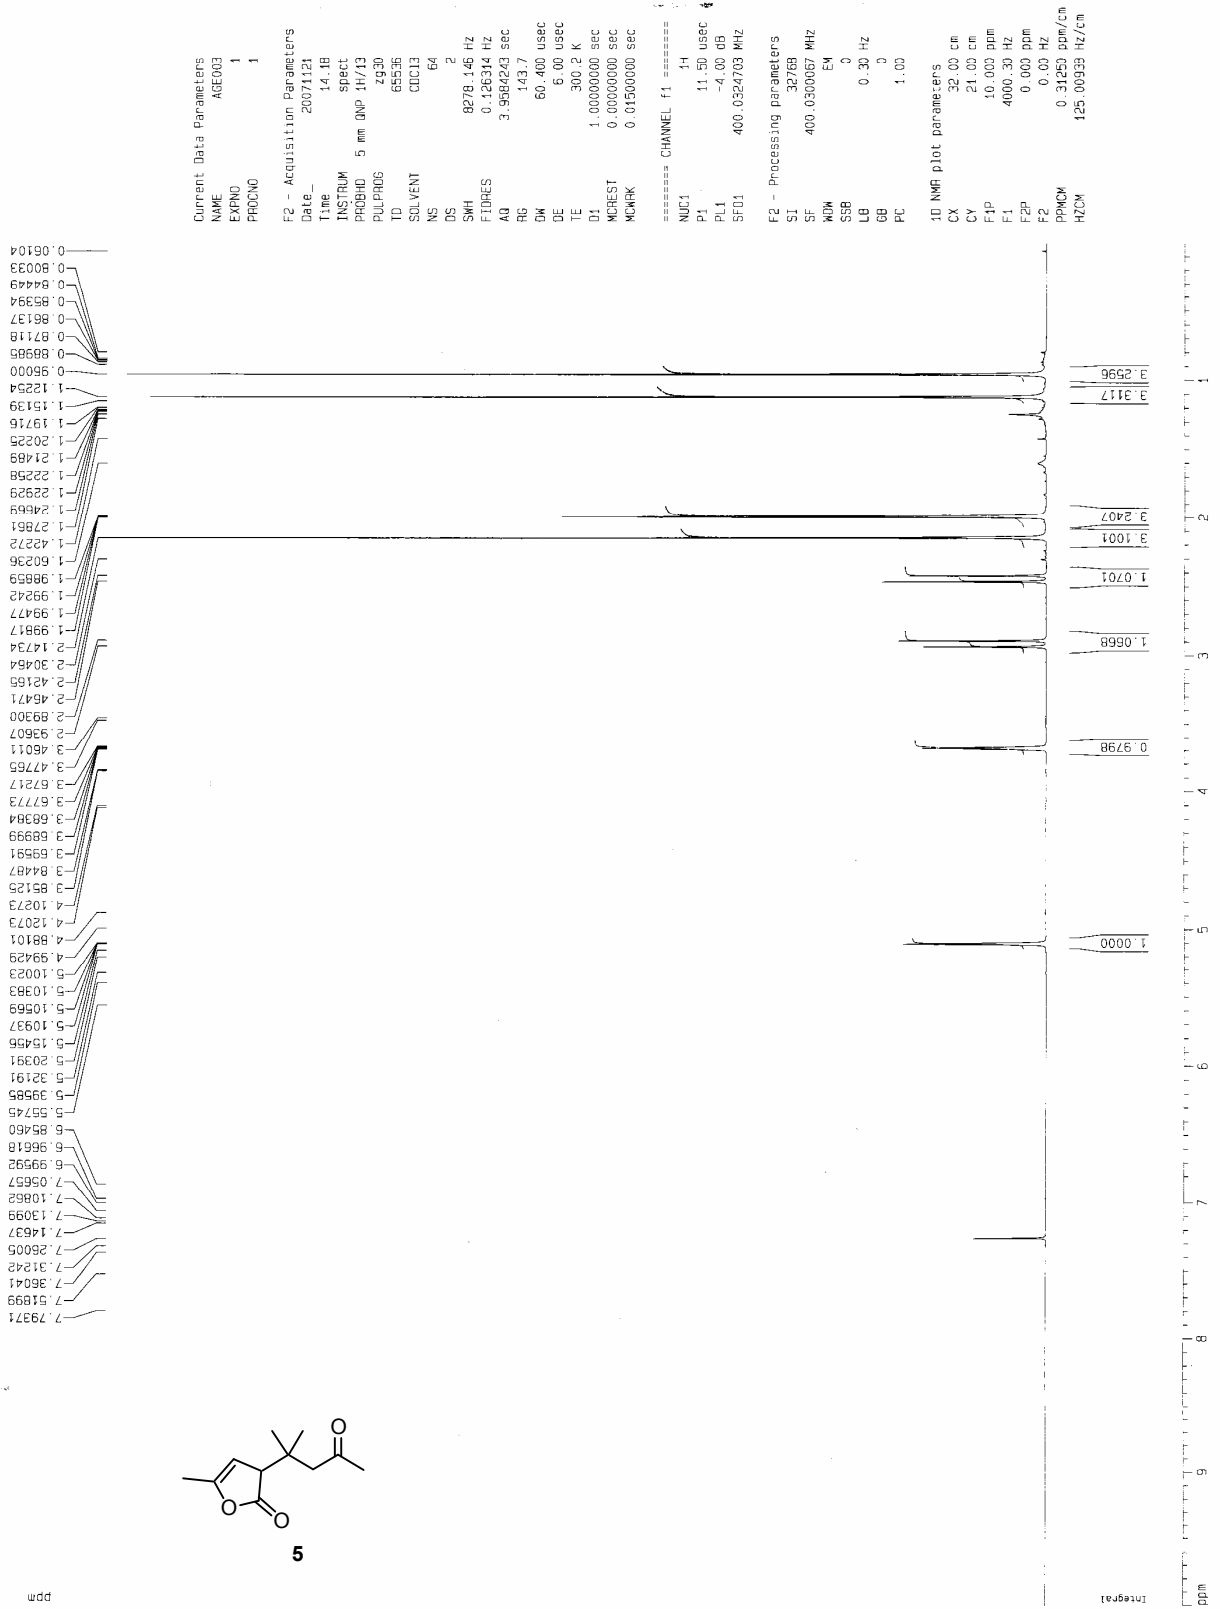



DPX400 carbon

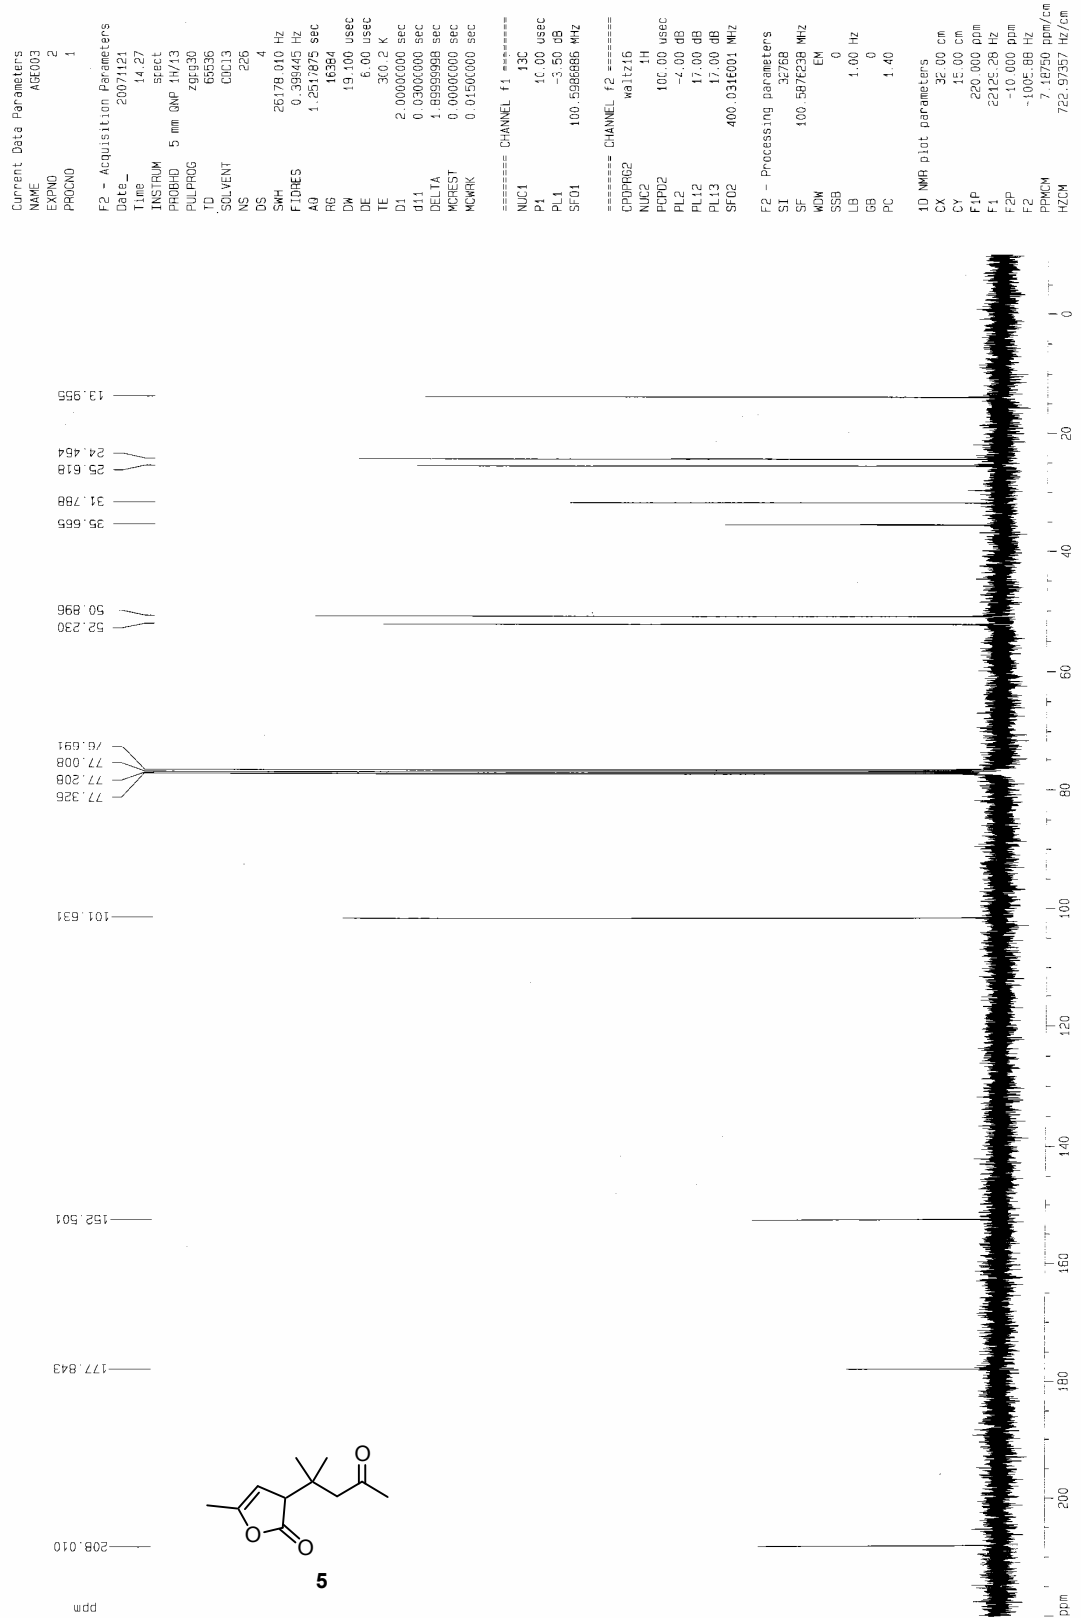

## **7. References**

1. Koshar, R. J.; Barber, L. L. *United States Patent* **1977**, 4053519.
2. Taniguchi, M.; Kim, H.; Ra, D.; Schwartz, J. K.; Kirmaier, C.; Hindin, E.; Diers, J. R.; Prathapan, S.; Bocian, D. F.; Holten, D.; Lindsey, J. S. *J. Org. Chem.* **2002**, *67*, 7329-7342.
3. Bentley, K. W.; Ball, J. C. *J. Org. Chem.* **1958**, *23*, 1720-1725.
4. Pavlyuchenko, A. I.; Purvaneckas, G.; Smirnova, N.I.; Titov, V. V. *Zh. Organiche. Khim.* **1986**, *22*, 1524-1529.
5. Rassu, G.; Zanardi, F.; Battistini, L.; Gaetani, E.; Casiraghi, G. *J. Med. Chem.* **1997**, *40*, 168-180.
6. Abe, M.; Torii, E.; Nojima, M. *J. Org. Chem.* **2000**, *65*, 3426-3431.
7. Asaoka, M.; Yanagida, N.; Sugimura, N.; Takei, H. *Bull. Chem. Soc. Jpn.* **1980**, *53*, 1061-1064.
